1 **Re-programming of *Pseudomonas syringae* pv.**  
2 ***actinidiae* gene expression during early stages of**  
3 **infection of kiwifruit**

4

5

6 Peter McAtee<sup>1</sup>, Lara Brian<sup>1</sup>, Ben Curran<sup>1,2</sup>, Otto van der Linden<sup>1</sup>, Niels Nieuwenhuizen<sup>1</sup>,  
7 Rebecca Henry-Kirk<sup>1</sup>, Simona Nardoza<sup>1</sup>, Erik H. A. Rikkerink<sup>1</sup>, Cris G. Print<sup>3</sup>, Andrew C.  
8 Allan<sup>1,2</sup>, Matthew D. Templeton<sup>1,2,4,\*</sup>

9

10

11

12

13 \*Correspondence: Matthew Templeton, [matt.templeton@plantandfood.co.nz](mailto:matt.templeton@plantandfood.co.nz), The New Zealand Institute for  
14 Plant & Food Research Limited, Auckland, New Zealand

15

16

17

18 **Running Title: Re-programming of *Psa* gene expression during infection**

19

20

21

22

23 **Keywords: RNA-seq, type III effectors, pathogenicity, secreted proteins**

24

25

26

27

28 Word count

## 29 **Abstract**

30

31 **Background:** *Pseudomonas syringae* is a widespread bacterial species complex that  
32 includes a number of significant plant pathogens. Amongst these, *P. syringae* pv. *actinidiae*  
33 (*Psa*) initiated a worldwide pandemic in 2008 on cultivars of *Actinidia chinensis* var.  
34 *chinensis*. To gain information about the expression of genes involved in pathogenicity we  
35 have carried out transcriptome analysis of *Psa* during the early stages of kiwifruit infection.

36

37 **Results:** Gene expression in *Psa* was investigated during the first five days after infection  
38 of kiwifruit plantlets, using RNA-seq. Principal component and heatmap analyses showed  
39 distinct phases of gene expression during the time course of infection. The first phase was  
40 an immediate transient peak of induction around three hours post inoculation (HPI) that  
41 included genes that code for a Type VI Secretion System and nutrient acquisition  
42 (particularly phosphate). These genes are probably involved in immediate adaption to the  
43 surface of the plant. This was followed by a significant commitment, between 3 and 24 HPI,  
44 to the induction of genes encoding the Type III Secretion System (T3SS) and Type III  
45 Secreted Effectors (T3SE). Expression of these genes collectively accounted for 6.3% of  
46 the bacterial transcriptome at this stage. There was considerable variation in the  
47 expression levels of individual T3SEs but all followed the same temporal expression pattern,  
48 with the exception of HopAS1, which peaked in expression at 48 HPI. As infection  
49 progressed over the time course of five days, there was an increase in the expression of  
50 genes with roles in sugar, amino acid and sulfur transport and the production of alginate and

51 colanic acid. These are both polymers that are major constituents of extracellular  
52 polysaccharide substances (EPS) and are involved in biofilm production.

53

54 **Conclusions:** The results from this study indicate that there is a complex remodeling of the  
55 transcriptome during the early stages of infection, with at least three distinct phases of  
56 coordinated gene expression. These include genes induced during the immediate contact  
57 with the host, those involved in the initiation of infection, and finally those responsible for  
58 nutrient acquisition.

59

## 60 **Background**

61

62 *Pseudomonas syringae* is a widespread bacterial species complex that comprises plant  
63 epiphytes and pathogens, as well as being found in non-plant environments such as  
64 waterways [1, 2]. Each pathovar of *P. syringae* has a relatively narrow host range related  
65 to the specific effector and secondary metabolite profile encoded by its accessory genome.  
66 Effectors are proteins that are secreted into plant cells via the Type III Secretion system  
67 (T3SS) that function to repress the host defense response [3]. The kiwifruit vine (*Actinidia*  
68 Lindl spp.) disease pathogen *P. syringae* pv. *actinidiae* (*Psa*) was first identified in Japan in  
69 1984 [4, 5] and was subsequently found in Korea in the 1990s [6]. Both these strains  
70 caused canker symptoms, but did not spread from their country of origin. In 2008, a  
71 particularly virulent canker-causing strain of *Psa* was reported in Italy and it quickly  
72 decimated plantings of *A. chinensis* var. *chinensis* cultivars, particularly 'Hort16A',  
73 'Hongyang' and 'Jin Tao' [7]. This strain was found in other kiwifruit-growing regions  
74 including New Zealand, Chile and China by 2010 [8].

75 Whole genome sequence analysis was carried out on over 25 strains of *Psa*  
76 representing isolates from all locations where *Psa* had been reported. Phylogenetic  
77 analysis of the core genome indicated that the canker-causing isolates formed three clades.  
78 The first clade comprised the initial isolates from Japan, the second those collected in the  
79 1990s from Korea and the third the pandemic outbreak strains from Italy, New Zealand,  
80 Chile and China [9-11]. Isolates within these clades are designated as biovars [12]. The  
81 core genome of isolates from the pandemic clade (biovar 3) differed by very few Single

82 Nucleotide Polymorphisms (SNPs) suggesting that this is a clonal population; however, the  
83 isolates from New Zealand, Italy, Chile and China each possessed a different member of a  
84 family of integrative conjugative elements [9-11]. More recently a comprehensive  
85 phylogenetic analysis of eighty *Psa* isolates has shown the origin of the pandemic strains to  
86 be China [13]. Two new biovars of *Psa* have been recently discovered in Japan [14, 15],  
87 and thus the location of the source population of *Psa* biovars has yet to be conclusively  
88 determined.

89 The three canker-causing biovars each had a surprisingly varied accessory genome with  
90 different complements of genes encoding effectors and toxins [11, 16]. Many of these  
91 genes are encoded on putative mobile genetic elements. While bioinformatic analysis has  
92 identified genes that might be unique to the recent outbreak clade, little is known about the  
93 expression of these and other genes that might have a crucial role in pathogenicity.  
94 Surprisingly there are few RNA-seq data on the early stages of infection of plants by  
95 pathogenic bacteria, including *P. syringae*.

96 Several transcriptome studies have been carried out on different *P. syringae* pathovars  
97 [17, 18]. The most comprehensive *in planta* analysis has been of *P. syringae* pv. *syringae*  
98 (*Pss*) B728a. This pathovar is a particularly successful epiphyte as well as a pathogen of  
99 bean (*Phaseolus vulgaris* L.). Global analysis of the transcriptome as an epiphyte,  
100 pathogen, and under various stress conditions was carried out using a microarray  
101 covering >5000 coding sequences [19, 20]. The transcript profiles indicated that success  
102 as an epiphyte is enabled by flagellar motility, swarming motility based on surfactant  
103 production, chemosensing, and chemotaxis. This could indicate active relocation primarily

104 on the leaf surface. Occupation of an epiphytic niche was accompanied by high transcript  
105 levels for phenylalanine degradation, which may help to counteract phenylpropanoid-based  
106 plant defenses [19]. In contrast, intercellular or apoplastic colonization led to the high-level  
107 expression of genes for  $\gamma$ -aminobutyric acid (GABA) metabolism (degradation of GABA  
108 would attenuate GABA repression of virulence) and the synthesis of phytotoxins, syringolin  
109 A and two additional secondary metabolites. Perhaps surprisingly the T3SS and T3SEs  
110 were not found to be strongly induced in the apoplast [19]. Subsequent analysis of several  
111 regulatory mutants illustrated a central role for GacS, SalA, RpoN, and AlgU in global  
112 regulation in *Pss* B728a *in planta* and a high degree of plasticity in these transcriptional  
113 regulators' responses to distinct environmental signals [20].

114 More recently a comprehensive analysis of gene expression by *P. syringae* pv. *tomato*  
115 DC3000 (*Pto*) has been carried out on wild-type Arabidopsis and several defense gene  
116 mutants [21]. T3SS and T3SEs genes were upregulated *in planta*, as were transporter  
117 genes. A key finding was that Arabidopsis perturbs iron homeostasis in *Pto* [21].

118 To gain additional information about the expression of genes involved in pathogenicity,  
119 we have carried out transcriptome analysis of *Psa* grown *in vitro* on minimal media and *in*  
120 *planta* during the early stages of kiwifruit infection, using an RNA-seq approach. Our  
121 analysis showed that there are at least three distinct coordinated phases of gene expression  
122 and has resulted in the discovery of several uncharacterized genes that may have a role in  
123 pathogenicity.

124

## 125 **Results**

126

### 127 **Infection assay and RNA-seq time course**

128 Infection assays of kiwifruit tissue-cultured plantlets with *Psa* were performed in flood-  
129 inoculated tissue culture vessels under sterile conditions. This method gave consistent and  
130 reproducible infection rates, with visible leaf-spot symptoms progressively developing from  
131 day 5. A time course was carried out to assess the rate of infection and to measure and  
132 distinguish the relative populations of apoplastic and leaf surface-colonizing (epiphytic)  
133 bacteria. Bacterial counts in the apoplast (surface sterilized samples) rose rapidly during  
134 the first six days post inoculation and reached a plateau at approximately  $10^8$  colony-forming  
135 units (CFU) thereafter (Figure 1). Total bacterial counts (non-surface sterilized samples),  
136 which included both apoplastic and epiphytic bacteria, rose from  $10^5$  to  $10^8$  CFU during the  
137 time course. The results suggest that for the first two days of infection, the majority of live  
138 cells were located epiphytically on the surface of the plant, but that the proportion of  
139 apoplastic colonizing bacteria progressively rose from days 2 to 6 so that the apoplast  
140 became the predominant niche from that time on.

141 A time course of five days (120 hours) was selected for the RNA-seq analysis, with a  
142 focus on very early time points to identify genes induced in the first stages of contact with  
143 the plant surface and subsequent infection. It was postulated that key genes responsible  
144 for the initiation of infection would be induced at the early stages of contact with the plant  
145 surface. Obtaining significant numbers of bacterial reads from infected plants at the early

146 stages of infection is extremely challenging. For this reason, leaves were not surface  
147 sterilized before RNA extraction.

148

### 149 **RNA-seq expression profile**

150 Trimmed reads were mapped onto the complete *Psa* ICMP 18884 genome (CP011972.2  
151 and CP011973) [22]. All 27 control uninfected treatments showed no reads mapping to the  
152 genome. A principal component analysis (PCA) was carried out on the inoculated samples  
153 to assess overall similarity, and the three biological replicates showed little variance within  
154 each time point (Figure 2A). PCA also demonstrated that each of the *Psa*-infected tissue  
155 samples belonged to one of three major phases that closely aligned to the post inoculation  
156 period and that were distinct from the *in vitro* control. The component groupings included  
157 the *in vitro* control, an early phase of infection (1.5 and 3 hours post infection, HPI), a mid-  
158 phase of infection (6, 12, and 24 HPI), and a late phase of infection (48, 72, 96, and 120  
159 HPI) (Figure 2B).

160

### 161 **Heat map analysis with k-means clustering**

162 Comparison of expression profiles is a powerful tool that can be used to identify and discover  
163 genes under the same regulatory regime. Furthermore, it was postulated that novel genes  
164 that showed similar expression profiles to known genes involved in pathogenicity might also  
165 have a role in causing disease. To identify such genes, similarities in the expression values  
166 for each gene were determined by first normalizing expression against its maximum value  
167 and then clustering by k-means analysis [23]. This analysis was restricted to those genes



168 displaying Reads Per Kilobase per Million (RPKM) values over 50 for at least one time-point,  
169 to eliminate lowly expressed genes from the analysis [24]. Of the 5985 predicted gene  
170 models in the core and accessory genomes of *Psa*, 269 genes did not display evidence of  
171 being expressed at any sample point, 1473 had no sample point with an RPKM above 50,  
172 and 4243 genes had at least one sample point with an RPKM value above 50 (Table S1).  
173 Hierarchical Clustering on Principal Components (HCPC) using the remaining 4243 genes  
174 was used to partition a k-means analysis of genes into 13 clades (clusters) based on their  
175 expression profiles (Figure 3). These were further consolidated into six groups based on  
176 their broader expression patterns (Table 1). Of these 4243 genes, 1137 were constitutively  
177 expressed, 1323 genes were down-regulated *in planta*, and a further 815 did not show  
178 significant differential expression (Table 1). The remaining 968 genes were up-regulated  
179 *in planta* compared with *in vitro* and thus likely to have the most direct relevance to  
180 pathogenicity. Of the upregulated genes, there were three distinct groupings that differed  
181 in their temporal patterns and level of gene expression over the time course. These groups  
182 corresponded to 107 genes induced in the early (1.5 and 3 HPI) time points (early phase),  
183 followed by a group of 311 genes highly induced between 3 and 24 HPI (mid phase). The  
184 latter group included the majority of the T3SS and T3SE genes controlled by the HrpL  
185 regulon. Finally, 550 genes increased in their expression towards the late (48-120 HPI) time  
186 points (late phase). These three phases of gene expression were similar to the groupings  
187 identified by PCA analysis (Figure 1). Expression profiles were subsequently evaluated in  
188 more detail for genes with known or as yet undetermined roles in pathogenicity.

189

190 **Early phase of infection was characterized by the induction of a type VI secretion**  
191 **system and nutrient adaptation**

192 Approximately 100 genes were up-regulated immediately upon contact with the host in the  
193 early phase of infection (1.5-3.0 HPI). These were found in clade 12 from the clustering  
194 analysis (Figure 3, Table 1). The majority of these genes were annotated as being involved  
195 in nutrient acquisition (Table S2). This probably reflects the adaptation to the surface of a  
196 leaf, where nutrients are more scarce [25]. Genes that were particularly highly expressed  
197 included those predicted to be involved in phosphate and iron transport. In addition, some  
198 genes involved in the degradation of cell wall polymers, including a polygalacturonase  
199 (IYO\_008325), were in this group. However, few genes predicted to have a direct role in  
200 pathogenicity were found. Two of the 43 annotated chemotactic response genes  
201 (chemoreceptors) found in the *Psa* genome were highly expressed during the early phase  
202 (Table S2), but these two are not amongst those previously functionally characterized [26].  
203 These chemoreceptors could have a role in locating stomata or other potential sites of entry  
204 into the plant. Another set of genes that was highly induced in this phase encodes a  
205 putative Type VI Secretion System (T6SS). Effectors secreted through the T6SS have a  
206 variety of roles usually associated with killing both prokaryotic and eukaryotic cells [27].  
207 Roles for T6SS effectors as virulence factors for animal pathogens have been well  
208 documented; however, there is as yet no evidence for an equivalent function in plant  
209 pathogens [28, 29]. Alternatively, the T6SS induced by *Psa* may have a role under field  
210 conditions in the antagonism of competing epiphytic microbes on the leaf surface.

211

## 212 **Mid-phase of infection was characterized by expression of T3SS and T3SEs**

213 Genes from three clades (6, 10 and 11) from the clustering analysis show increased  
214 expression 3-24 HPI (Table 1). Of these the most striking is a large transcriptional  
215 commitment to the induction of the T3SS apparatus and the expression of T3SEs, which  
216 were among the most highly upregulated genes within these time points (Figure 3; Table  
217 S3). Transcripts encoding for T3SS and T3SEs rose from 1.5 HPI, peaking between 3 and  
218 12 HPI before falling to about half maximal levels for the remainder of the time course.  
219 Between 3 and 12 HPI these genes collectively accounted for 6.3% of the total reads (Table  
220 S3). Expression of HrpA1 was by far the highest of all T3SS genes, accounting for over  
221 50% of these reads. The HrpA protein comprises the needle of the T3SS apparatus. For  
222 plant pathogens the needle is much longer than that of animal pathogens because of the  
223 need to penetrate the host cell wall, thus presumably requiring higher expression of the  
224 corresponding gene [30].

225 The *Psa* biovar 3 genome has 40 genes encoding T3SEs, and 35 of these are predicted  
226 to encode full-length proteins [11], including one additional T3SE (HopBN1) recently  
227 identified (<http://pseudomonas-syringae.org/>). The expression profile of T3SEs during the  
228 mid-phase of infection followed that of the T3SS transcripts, rising rapidly after 1.5 HPI, with  
229 a maximum between 3 and 12 HPI, and then falling for the rest of the time course to around  
230 20-40% of the highest level. The expression levels of each effector varied considerably:  
231 most were relatively abundant, in particular HopAU1, HopS2, HopAO2, HopAZ1, HopZ5 and  
232 HopF2, AvrRmp1, AvrB4 and AvrPto5 peaked at over 1000 RPKM (Table S4). However,  
233 several other effectors were weakly expressed during all the early phases of infection < 150

234 RPKM, such as HopAH1 and HopBB1-2 (Table S4). This may be due to lack of a role for  
235 these particular genes in the infection of kiwifruit, expression at the later stages of disease  
236 development (after 120 HPI), or a role in the infection of tissues other than leaves. The  
237 effector that displayed the most distinct temporal expression profile was HopAS1. This  
238 effector had low expression in the second phase of infection and peaked at 48 HPI. *Pto*  
239 strains that are pathogenic on *Arabidopsis thaliana* carry a truncated version of this effector,  
240 which is widely distributed in *P. syringae* [31]. Full-length versions caused effector-triggered  
241 immunity in almost all ecotypes of *Arabidopsis*, explaining why it effectively operates as a  
242 barrier to infection in this non-host. In contrast, deletion of the full-length version of HopAS1  
243 reduced virulence of *Pto* on tomato, suggesting it has a virulence function on this natural  
244 host. Both the *Pto* and *Psa* orthologs of this effector have a putative HrpL box situated  
245 upstream of their putative start sites. In between lies a short uncharacterised potential open  
246 reading frame which could be an “unrecognised” effector chaperone. The HopAS1 effector  
247 is also found in *P. syringae* pv. *phaseolicola*, where it was not found to be differentially  
248 expressed in response to induction of the HrpL TTSS regulatory system [32]. Unfortunately  
249 there are no strong clues about the possible biochemical function of HopAS1. It is one of  
250 the largest effectors (over 1300 residues, third largest *Psa* effector). Automated searching  
251 of the conserved domain database at NCBI identified just one tentative match (Bit score 51;  
252 E-value  $5.7e^{-6}$ ) to a 330 residue portion of a heterodimerization domain in the N-terminus of  
253 the chromosome maintenance protein superfamily [33, 34]. This could indicate that the  
254 function of this effector is not focused on post-translational modification of plant defence  
255 proteins (as the majority of *P. syringae* effectors appear to be), but that it targets host

256 chromatin remodelling processes associated with later stages of the defence response, and  
257 could be an explanation for its unusual expression profile in *Psa*. Recently HopAS1 was  
258 shown to be one of only six T3SEs from *Pto* able to bind to yeast plasma membrane, binding  
259 to several different phospho-inositol derivatives [35]. Unfortunately this research appears to  
260 have been performed with the truncated version of this gene from *Pto* DC3000. In contrast,  
261 the full-length HopAS1 from *Psa* could not be localised when expressed in *Nicotiana*  
262 *benthamiana*, but this may be because it triggers cell death in that host [36].

263 T3SS and T3SEs are under the control of the HrpL regulon and hence their co-regulation  
264 would be expected. Several other genes that do not code for T3SEs also possess HrpL  
265 boxes 5' to their start site. These include genes that encode a putative lytic transglycosylase  
266 (IYO\_006775), M20 peptidase (IYO\_027210), ApbE involved in thiamine biosynthesis  
267 (IYO\_010630), a phosphatidylserine decarboxylase (IYO\_025425), and an indole acetic  
268 acid-lysine ligase (IAAL, IYO\_002060, Table S5). IAAL is found adjacent to a gene encoding  
269 a multidrug and toxic compound extrusion protein (MATE, IYO\_002055) on the chromosome  
270 of many *P. syringae* and *P. savastanoi* pathovars. Some *P. savastanoi* pathovars have an  
271 additional plasmid-associated IAAL copy linked with indole acetic acid (IAA) production and  
272 gall formation. The proteins encoded by these genes are 92% identical, and the plasmid-  
273 located copy has been expressed heterologously and functionally characterized [37]. IAAL  
274 is postulated to convert free IAA into less active conjugate forms [38]. Heterologous  
275 expression of IAAL in tobacco and potato led to abnormal developmental changes [39].  
276 Transcript levels of *Psa iaal* were induced early in infection and, in contrast to T3SS and  
277 T3SEs, remained high throughout the infection period; however, the adjacent *mate* gene did

278 not appear to be highly expressed during this time period (Figure 4). In *Pto* DC3000 it has  
279 been shown that *iaaI* can be both transcribed independently and co-transcribed with *mate*  
280 as an operon [40].

281 Other sets of genes that were strongly expressed during the mid-phase of infection (3-  
282 12 HPI) included four co-located genes on two operons that code for a diguanylate cyclase  
283 and two transcription factors, and thus may have a regulatory role (IYO\_012110-25) (Table  
284 S6). Another set of four genes in two operons contains proteins involved in metal transport  
285 (IYO\_003310-25); included in these is the highly expressed copper resistance/binding  
286 protein CopZ (IYO\_003325). Very high expression of the chemotaxis protein IYO\_006420  
287 was also observed; while not a membrane-bound chemoreceptor, it is predicted to contain  
288 a 4-helix bundle, which is a common chemoreceptor sensor domain [26]. This protein is  
289 predicted to be structurally similar to di-iron binding proteins (Pfam 09537), suggesting an  
290 alternate role in iron acquisition as opposed to chemoreception.

291

## 292 **Late phase of infection was driven by nutrient acquisition and EPS production**

293 A total of 550 genes were upregulated in the later phase of infection (groups 7-9). Ninety  
294 genes increased over 5-fold in expression between 1.5 and 120 HPI (Table S7). Of these  
295 genes, 14 were annotated to be involved in alginate and colanic acid biosynthesis and  
296 polymer export. Alginate is a hygroscopic polymer composed of D-mannuronic acid  
297 residues interspersed with L-guluronic acid residues with various degrees of acetylation [41].  
298 This polymer has an important role in biofilm production and is well characterized in *P.*  
299 *aeruginosa* [42]. *P. syringae* is also known to produce alginate, but its role in pathogenicity

300 is less well understood [43]. Recently it has been shown that alginate accumulates in high  
301 amounts in the sub-stomatal spaces in *Psa*-infected leaves of kiwifruit (Sutherland et al.,  
302 unpublished). A further 26 genes in this grouping were annotated as having a role in  
303 metabolite transport. This strongly suggests that as early-stage infection progresses there  
304 is a widespread induction of genes involved in metabolite transport and nutrient acquisition.  
305 These transporters are distinct from those observed in the early phase of leaf colonization.

306

### 307 **Expression of secondary metabolite pathways during infection**

308

309 Several predicted secondary metabolite biosynthesis pathways have been identified in *Psa*  
310 using either antiSMASH 3.0 [44], or by similarity to known biosynthetic pathways (Table S8).  
311 Three of these pathways, for achromobactin, pyoverdine and yersiniabactin, are involved in  
312 iron accumulation. *Psa* biovar 3 produces fluorescent compounds, i.e. pyoverdine, when  
313 grown on King's B medium, but to a lesser extent than other *Psa* biovars [8]. The genes that  
314 code for this pathway appear to be poorly expressed *in planta* and on minimal media (Table  
315 S8). Genes coding for the alternative iron siderophores yersiniabactin and achromobactin  
316 are present in *Psa* but were also expressed at low levels *in planta* (Table S8). It has  
317 recently been postulated that plants are able to interfere with iron homeostasis in pathogenic  
318 bacteria, which may explain the apparent lack of expression of these pathways *in planta*  
319 [21]. Alternatively, *Psa* may be using a different mechanism for acquiring iron.

320 *Psa*-infected kiwifruit leaves show a distinct chlorotic halo which is presumably the result  
321 of the diffusion of a phytotoxin [8]. In addition to the three pathways with roles in iron

322 absorption, there were four other secondary metabolite pathways identified in the *Psa* biovar  
323 3 genome that have potential roles in pathogenicity and might account for leaf chlorosis.  
324 *Psa* biovar 3 possesses gene clusters involved in the biosynthesis of mangotoxin, a novel  
325 non-ribosomal peptide (NRP; IYO\_003775-003830), an unknown metabolite (IYO\_026725-  
326 026760), and an unknown compound synthesized from chorismate; the last-named pathway  
327 is plasmid-borne (Table S8). The genes involved in mangotoxin biosynthesis, NRP, and  
328 the unknown metabolite did not appear to be significantly induced during the early stages of  
329 infection, although genes in the NRP pathway were constitutively expressed between 50  
330 and 100 RPKM throughout the infection time course (Table S8). While BLAST/antiSMASH  
331 searches did not identify likely products of either of the unknown biosynthetic pathways,  
332 many *Pseudomonas* spp. produce surfactive molecules to wet the leaf surface to aid motility  
333 [45]. In addition, the apoplast is a relatively dry environment that pathogens often modify  
334 to increase the relative humidity. For example, *syfA* - an NRP from *Pss* - produces an  
335 extremely hygroscopic molecule that facilitates wetting of surfaces including the leaf surface  
336 and apoplast [46-48].

337 The uncharacterized biosynthetic pathway on the plasmid of *Psa* biovar 3 has two  
338 operons, and is adjacent to a LuxR receptor [49]. The first operon codes for a chorismate-  
339 utilizing enzyme and a glutamine amidotransferase (annotated as anthranilate synthase I  
340 and II) [11]. The second operon codes for the biosynthesis and secretion of a putative  
341 aromatic, but uncharacterized, compound that was strongly induced *in planta* after 12 HPI  
342 and remained steady for the remainder of the time course (Table S8, Figure 5). The  
343 plasmid-localized secondary metabolite pathway is not widespread in *P. syringae* but



344 interestingly is also present in the vascular pathogen *Xylella fastidiosa*, the causal agent of  
345 Pierce's disease, and some root-associated *Pseudomonas* species [11].

346

### 347 **Proteins secreted through the type II secretion system**

348 In addition to the translocation of proteins through specialized structures such as the T3SS  
349 and the T6SS, bacteria also use the Sec or Tat systems to secrete proteins into the  
350 periplasm for the Type II secretion system (T2SS) to export [50]. This system will target  
351 proteins *in planta* to the apoplast, as opposed to the cytoplasmic location of the T3SEs.  
352 This is an important function since the plant apoplast has a number of largely constitutive  
353 antimicrobial defenses such as phytoanticipins, hydrolytic enzymes and enzyme inhibitors  
354 that may need to be inactivated to facilitate colonization. Recently analysis of the *Pto*  
355 secretome identified a protease inhibitor *Cip1* as playing a role in virulence of *Pto* on  
356 tomato [51]. We were therefore interested to see if there were T2SS proteins upregulated  
357 in the early and mid-phases of infection.

358 Type II secreted proteins (T2SP) can be identified by their canonical secretory leader  
359 sequence using SignalP [52]. Five hundred and thirty-nine proteins were predicted to be  
360 secreted. Of these proteins, 21 were induced in the early phase of infection (clade12).  
361 Of the significantly induced genes (ratio RPKM 3HPI/RPKM *in vitro* >5), the majority are  
362 predicted subunits of membrane-bound complexes with a role in nutrient transport (Table  
363 S9). All of these had annotations assigned.

364 Twenty-six proteins with predicted leader sequences were present in the mid phase of  
365 infection (Table S9). Of those strongly expressed compared to *in vitro* growth, four were

366 annotated as hypothetical proteins. However, two of these predicted gene products have  
367 similarity to enzyme inhibitors. IYO\_001870 has homology to a superfamily of vertebrate  
368 lysozyme inhibitors and IYO\_009660 contains a region with homology to Pfam domain  
369 13670, present in some putative protease inhibitors. Both these proteins may have a role  
370 in neutralizing the apoplast and are candidates for further functional analysis. Forty-two  
371 non-annotated secreted proteins identified in the *Pto* genome were screened for the ability  
372 to inhibit the tomato C14 defense-related protease and one, Cip1, was shown to be an  
373 inhibitor [51]. Of these, 37 had orthologs (95% sequence identify) in *Psa* biovar 3 but only  
374 seven were clearly differentially expressed *in planta*. Interestingly, the *Psa* ortholog of  
375 Cip1 (IYO\_021465) was not differentially expressed during the time course in this study.

376

377

## 378 Discussion

379

380 RNA-seq was used to investigate the early stages of infection of kiwifruit plantlets by *Psa*  
381 biovar 3. This biovar is highly virulent on kiwifruit, with apoplastic CFU reaching a plateau  
382 from 6 days post inoculation. PCA and clustering analysis revealed three phases of gene  
383 expression *in planta* during early stages of colonization by *Psa*. The first was a rapid  
384 transient phase that occurred immediately upon contact with the plant. Included in these  
385 genes was a T6SS, which might have a role in pathogenesis, similarly to that in animal  
386 systems [27]. Alternatively, the T6SS may have a role in competition against epiphytic  
387 bacteria. Interestingly none of the other genes in this group had a predicted function that  
388 could have a direct role in pathogenicity. This suggests that these early expressed *Psa*  
389 genes play a role in rapid adaptation to the plant surface, since most of the bacterial  
390 counts were on the surface of the plant rather than the apoplast at this stage. Two  
391 chemotactic receptors were also highly expressed in this early phase. These are strong  
392 candidates for a role in sensing stomata, hydathodes and other points of entry for the  
393 pathogen.

394 In contrast, the mid phase of infection, which occurred between 3 and 12 HPI, included  
395 the T3SS and majority of the T3SEs. These genes were the most upregulated at these  
396 time points, accounting for over 6% of the transcripts detected. Similar results were  
397 observed for *Pto* colonization of Arabidopsis [21]. This is in contrast to the data observed  
398 for *Pss* during the early stages of infection of bean, where a large induction of either T3SS  
399 or T3SEs was not observed. This might be due to different infection strategies of the two

400 pathogens: *Pss* is regarded as a stronger epiphyte than other *P. syringae* pathovars,  
401 because the phylogroup it belongs to (II) has a greater focus on toxin production, and its  
402 members typically have fewer effectors than other *P. syringae* phylogroups [1]. The  
403 difference could alternatively be attributed to the different experimental approaches  
404 employed [19]. Levels of individual *Psa* T3SE gene expression varied considerably  
405 during the time course. However, the temporal expression pattern was largely consistent  
406 between effectors, with most (25/30) fitting into the mid-phase gene expression clusters 6,  
407 10 and 11. The most notable exception was HopAS1, which peaked later in expression  
408 around 48 HPI, as opposed to 3-12 HPI for most other effectors.

409 The roles of the T3SS and T3SE in repressing the induced host defense response are  
410 increasingly well understood. Less well understood is the repression of constitutive plant  
411 defenses in the apoplast, the inactivation of which is an essential prerequisite to the  
412 establishment of the T3SS. These defenses include phytoanticipins, cell wall degrading  
413 enzymes, proteases and enzyme inhibitors. Furthermore, the apoplast is a relatively dry  
414 space that needs to be humidified to optimize colonization [47, 48]. Two resident proteins  
415 in the conserved effector locus, HopM and AvrE, appear to be important in establishing the  
416 right humidity conditions in other *P. syringae* hosts [53], and in *Psa* these effectors both  
417 follow the mid-peak expression profile but show only average expression levels. This study  
418 has also identified two predicted proteins that may have a role in neutralizing the apoplast.  
419 One was a predicted lysozyme inhibitor (IYO\_001870) and the other a predicted protease  
420 inhibitor (IYO\_009660). It is likely, however, that there are further genes to be discovered

421 that play a role in neutralizing the apoplast, including the production of potential  
422 surfactants.

423 The final phase comprised of genes whose expression progressively increased over  
424 the five-day (120 h) time course. Included were a raft of genes coding for proteins  
425 involved in nutrient acquisition such as transporters. Notably, these were different  
426 transporters from those induced at the very early phase of infection. There was also  
427 strong induction of genes involved in alginate and colanic acid production. These  
428 compounds are a large component of the extracellular polysaccharide substances (EPS)  
429 and known virulence factors of *Pseudomonas* [41, 43]. Their precise role in pathogenicity  
430 is not known, but they have been postulated to protect the bacteria from adversity, in this  
431 case plant defenses, and also to enhance adhesion to solid surfaces. Indeed alginate  
432 synthesis, along with ice nucleation, auxin synthesis and auxin inactivation by IAAL, is  
433 common among the canonical *P. syringae* lineages that have been traced back to a last  
434 common ancestor (LCA) 150-180 million years ago [54]. Another component predicted  
435 to be derived from the LCA is the tripartite pathogenicity island structure consisting of  
436 the *hrp/hrc* gene cluster flanked by both the Conserved Effector Locus and an  
437 exchangeable effector locus (EEL). *Psa* shows this tripartite structure, albeit that the  
438 EEL is further away from the other two pathogenicity islands. The heat map analysis did  
439 not highlight any obvious differences in expression patterns between the effectors  
440 located on these three pathogenicity islands.

441 While effectors are well known to play a role in plant defense suppression, the role of  
442 many other genes expressed during infection is far less certain. This study has identified

443 a number of non-effector genes that were strongly induced *in planta* and are likely to be  
444 having a role in establishing infection. The relative importance of these will need to be  
445 ascertained using either gene knockouts or TraDIS (Transposon Directed Insertion-site  
446 Sequencing) [55, 56].

447

## 448 **Conclusions**

449

450 The results from this study indicate that there is a complex remodeling of the bacterial  
451 transcriptome during the early stages of infection, with at least three distinct phases of  
452 coordinated gene expression. The first includes genes induced during the immediate  
453 contact with the host. These were dominated by the expression of a T6SS and genes  
454 annotated as involved in nutrient transport. The second phase was dominated by genes  
455 predicted to have roles in initiating infection and includes the T3SS and T3SEs. Included  
456 in this group are novel proteins that may have roles in neutralizing constitutive defenses in  
457 the apoplast. The final phase includes genes involved in nutrient transport and biofilm  
458 formation.

459

## 460 **Experimental Procedures**

461

### 462 **Infection assays**

463 *Actinidia chinensis* Planch. var. *chinensis* 'Hort16A' plantlets, grown from axillary buds on  
464 Murashige and Skoog rooting medium without antibiotics in a 400-mL clear plastic tub with  
465 a sealed lid, were purchased from Multiflora (<http://www.multiflora.co.nz/home.htm>).  
466 Plantlets were grown at 20°C under fluorescent lights with a 16 h on/8 h off regime and used  
467 within a month of purchase. For inoculation an overnight shake culture of *Psa* ICMP 18884  
468 was grown in liquid Lysogeny Broth (LB) [57] at 20°C and 180 rpm shaking. The cell density  
469 was determined by measuring the absorbance at 535 nm. Cells were washed in 10 mM  
470 MgSO<sub>4</sub> and resuspended at a cell density of 10<sup>7</sup> CFU/mL. The surfactant Silwet L-77 (Cat  
471 VIS-30, Lehle Seeds, Round Rock, TX, USA) was added to the inoculum to a concentration  
472 of 0.0025% (v/v) to facilitate leaf wetting. The inoculation method was modified from the  
473 method developed for *Arabidopsis* [58]. Containers with 'Hort16A' plantlets were filled with  
474 the inoculum fully submerging the plantlets and left for three minutes. Containers were  
475 drained, the lid replaced, then incubated in a controlled climate room at 20°C with a light/dark  
476 cycle of 16 h on/8 h off.

477

### 478 **Growth assay**

479 Leaf samples were taken at different times post inoculation as appropriate. Each sample  
480 consisted of four leaf discs, taken with a 1-cm diameter cork borer, from four different leaves.  
481 All four discs were taken from the same tub. To estimate CFU in the apoplast discs were

482 surface sterilized in 70% (v/v) ethanol for 30 s and subsequently washed in sterile Milli-Q  
483 water. Samples for estimation of total bacteria were not surface sterilized. Leaf discs  
484 were placed in Eppendorf tubes containing three stainless steel ball bearings and 300  $\mu$ L 10  
485 mM MgSO<sub>4</sub>, and macerated in a bead crusher for 2 min at maximum speed (Storm 24 Bullet  
486 Blender, Next Advance, Averill Park, NY, USA). A dilution series of the leaf homogenates  
487 was made in sterile 10 mM MgSO<sub>4</sub> until a dilution of 10<sup>-8</sup>. The dilution series was plated in  
488 5- $\mu$ L droplets on LB medium supplemented with both 12.5  $\mu$ g/mL nitrofurantoin and 40  
489  $\mu$ g/mL cephalixin. After 72 hours of incubation at 20°C CFU were counted for the lowest  
490 possible dilution(s), which was calculated back to the CFU per cm<sup>2</sup> of leaf area.

491

## 492 **RNA extractions**

493

494 RNA was extracted from *Psa* ICMP 18884 grown to late log phase at 18°C on Hoitnik and  
495 Sinden minimal media [59]. Cells were harvested and total RNA extracted using an Ambion  
496 RNA extraction kit (Thermo Fisher, Waltham, MA, USA). RNA was extracted from 1-month-  
497 old *A. chinensis* var. *chinensis* 'Hort16A' plantlets propagated from tissue culture infected  
498 with *Psa* as described above after 1.5, 3, 6, 12, 24, 48, 72, 96 and 120 HPI. Each time point  
499 consisted of three biological replicates. Three pots were used for each time point and each  
500 biological replicates consisted of three combined plantlets sampled across each of the three  
501 pots (Figure S1). Mock-inoculated plants were used as controls for each time point. RNA  
502 was extracted using the Spectrum™ Plant Total RNA Kit (Sigma-Aldrich, Milwaukee, WI,  
503 USA). Sequencing libraries were constructed from total RNA using the Ribo-Zero Plant



504 procedure (Illumina, San Diego, CA, USA).

505

## 506 **Bioinformatics and differential expression analysis**

507 Sequencing was performed using HiSeq2000 (Illumina) by Macrogen ([www.macrogen.com](http://www.macrogen.com)).

508 Raw RNA reads (100 bp paired end reads) were trimmed, quality filtered ( $\geq Q20$ ) and their

509 adaptors removed using Trimmomatic v0.36 [60]. The cleaned reads were mapped to the

510 *Psa* ICMP 18884 gene models [22] using the Bowtie2 v2.25 aligner in conjunction with

511 samtools [61]. To ensure the best alignments were made against each gene model, a

512 mapping quality  $> 10$  was used.

513 Analysis of mapped reads was done using the statistical software R (version 3.4.3). K-

514 means cluster analysis of expression data was done using the R packages ggplot2 (v2.2.1)

515 [62], FactoMineR (v1.39) [63] and FactoExtra (v1.05) [64]. Principal component analysis was

516 done using the R package DESeq2 (v1.18.1) [65].

517

## 518 **Abbreviations**

519 CFU: Colony-forming units; EEL: Exchangeable effector locus; GABA:  $\gamma$ -aminobutyric acid;  
520 HPCP: Hierarchical clustering on principal components; HPI: Hours post inoculation; EPS:  
521 Extracellular polysaccharide substances; LB: Lysogeny broth; LCA: Last common ancestor;  
522 PCA: Principal component analysis; *Psa*: *Pseudomonas syringae* pv. *actinidiae*; *Pss*:  
523 *Pseudomonas syringae* pv. *syringae*; Pto: NRP: Non-ribosomal peptide; *Pseudomonas*  
524 *syringae* pv. *tomato*; RPKM: Reads per kilobase per million; SNP: Single nucleotide  
525 polymorphism; T2SS: Type II secretion system; T2SP: Type II secreted proteins; T3SS: Type  
526 III Secretion System; T3SE: Type III Secreted Effectors; T6SS: Type VI Secretion System;  
527 TraDIS: Transposon directed insertion-site sequencing.

528

## 529 **Acknowledgements**

530 We would like to thank Dr Joanna K. Bowen and Amali Thrimawithana (Plant and Food  
531 Research) for critically reviewing this manuscript.

532

## 533 **Funding**

534 This work was funded by a grant from the New Zealand Ministry for Business, Innovation  
535 and Employment (C11X1205).

536

## 537 **Availability of data and materials**

538 The RNA-seq experiment is described in BioProject PRJNA472664 with separate  
539 BioSamples for each time-point (SAMN09240241-97), reads can be downloaded from the

540 Sequence Read Archive SRP148711 [66].

541

## 542 **Author contributions**

543 BC, ACA and CGP conceived of and designed the experiments. BC, RH-K and OvdL  
544 carried out the experiments and generated the data. PM, LB, EHR and MDT analyzed the  
545 data. MDT, PM, NN, SN, EHR, and ACA wrote the paper.

546

## 547 **Competing interests**

548 The authors declare that they have no competing interests.

549

## 550 **Ethics approval and consent to participate**

551 All experiments using *Psa* were carried out with the permission of the Ministry for Primary  
552 Industries, New Zealand (CTO approval 12-05-17) and The Environmental Protection  
553 Authority, New Zealand (APP202231).

554

## 555 **Author details**

556 <sup>1</sup>The New Zealand Institute for Plant and Food Research Limited, Auckland, New Zealand

557 <sup>2</sup>School of Biological Sciences, University of Auckland, Auckland, New Zealand

558 <sup>3</sup>Department of Molecular Medicine and Pathology, University of Auckland, New Zealand

559 <sup>4</sup>Bio-Protection Research Centre, New Zealand

560

## 561 References

562

- 563 1. Baltrus DA, Nishimura MT, Romanchuk A, Chang JH, Mukhtar MS, Cherkis K et al. Dynamic evolution of  
564 pathogenicity revealed by sequencing and comparative genomics of 19 *Pseudomonas syringae* isolates. PLoS  
565 Pathog. 2011;7(7):e1002132.
- 566 2. Monteil CL, Cai R, Liu H, Mechan Llontop ME, Leman S, Studholme DJ et al. Nonagricultural reservoirs  
567 contribute to emergence and evolution of *Pseudomonas syringae* crop pathogens. The New phytologist. 2013.
- 568 3. Büttner D. Behind the lines—actions of bacterial type III effector proteins in plant cells. FEMS Microbiology  
569 Reviews. 2016;40(6):894-937.
- 570 4. Serizawa S, Ichikawa T, Takikawa Y, Tsuyumu S, Goto M. Occurrence of bacterial canker of kiwifruit in Japan  
571 description of symptoms, isolation of the pathogen and screening of bactericides. Japanese Journal of  
572 Phytopathology. 1989;55(4):427-36.
- 573 5. Takikawa Y, Serizawa S, Ichikawa T, Tsuyumu S, Goto M. *Pseudomonas syringae* pv. *actinidiae* pv. nov the  
574 causal bacterium of canker of Kiwifruit in Japan. Japanese Journal of Phytopathology. 1989;55(4):437-44.
- 575 6. Koh Y CB, Chung H, Lee D. Outbreak and spread of bacterial canker in kiwifruit. Korean Journal of Plant  
576 Pathology. 1994;1068-72.
- 577 7. Balestra GM, Mazzaglia A, Quattrucci A, Renzi M, Rossetti A. Current status of bacterial canker spread on  
578 kiwifruit in Italy. Australasian Plant Disease Notes. 2009;434.
- 579 8. Everett KR, Taylor RK, Romberg MK, Rees-George J, Fullerton RA, Vanneste JL et al. First report of  
580 *Pseudomonas syringae* pv. *actinidiae* causing kiwifruit bacterial canker in New Zealand. Australasian Plant  
581 Disease Notes. 2011;667-71.
- 582 9. Butler MI, Stockwell PA, Black MA, Day RC, Lamont IL, Poulter RTM. *Pseudomonas syringae* pv. *actinidiae* from  
583 recent outbreaks of kiwifruit bacterial canker belong to different clones that originated in China. Plos One.  
584 2013;8(2):18.
- 585 10. Mazzaglia A, Studholme DJ, Taratufolo MC, Cai RM, Almeida NF, Goodman T et al. *Pseudomonas syringae* pv.  
586 *actinidiae* (Psa) Isolates from recent bacterial canker of Kiwifruit outbreaks belong to the same genetic  
587 lineage. Plos One. 2012;7(5):11.
- 588 11. McCann HC, Rikkerink EHA, Bertels F, Fiers M, Lu A, Rees-George J et al. Genomic analysis of the Kiwifruit  
589 pathogen *Pseudomonas syringae* pv. *actinidiae* provides insight into the origins of an emergent plant disease.  
590 PLoS Pathog. 2013;9(7):e1003503.
- 591 12. Cuntly A, Poliakoff F, Rivoal C, Cesbron S, Saux ML, Lemaire C et al. Characterization of *Pseudomonas syringae*  
592 pv. *actinidiae* (Psa) isolated from France and assignment of Psa biovar 4 to a *de novo* pathovar: *Pseudomonas*  
593 *syringae* pv. *actinidifoliorum* pv. nov. Plant Pathol. 2015;64(3):582-96.
- 594 13. McCann HC, Li L, Liu Y, Li D, Hui P, Zhong C et al. The origin and evolution of a pandemic lineage of the  
595 Kiwifruit pathogen *Pseudomonas syringae* pv. *actinidiae* Genome Biology and Evolution. 2017;9(4):932-44.
- 596 14. Fujikawa T, Sawada H. Genome analysis of the kiwifruit canker pathogen *Pseudomonas syringae* pv. *actinidiae*  
597 biovar 5. Scientific Reports. 2016;621399.
- 598 15. Sawada H, Kondo K, Nakaune R. Novel biovar (biovar 6) of *Pseudomonas syringae* pv. *actinidiae* causing  
599 bacterial canker of kiwifruit (*Actinidia deliciosa*) in Japan. Jpn J Phytopathol. 2016;82101-15.
- 600 16. Marcelletti S, Ferrante P, Petriccione M, Firrao G, Scortichini M. *Pseudomonas syringae* pv. *actinidiae* draft  
601 genomes comparison reveal strain-specific features involved in adaptation and virulence to *Actinidia* species.  
602 Plos One. 2011;6(11):17.
- 603 17. Filiatrault MJ, Stodghill PV, Bronstein PA, Moll S, Lindeberg M, Grills G et al. Transcriptome analysis of

- 604 *Pseudomonas syringae* identifies new genes, noncoding RNAs, and antisense activity. Journal of Bacteriology.  
605 2010;192(9):2359-72.
- 606 18. Filiatrault MJ, Stodghill PV, Wilson J, Butcher BG, Chen H, Myers CR et al. *CrcZ* and *CrcX* regulate carbon source  
607 utilization in *Pseudomonas syringae* pathovar *tomato* strain DC3000. RNA Biology. 2013;10(2):245-55.
- 608 19. Yu X, Lund SP, Scott RA, Greenwald JW, Records AH, Nettleton D et al. Transcriptional responses of  
609 *Pseudomonas syringae* to growth in epiphytic versus apoplastic leaf sites. Proc Natl Acad Sci U S A.  
610 2013;110(5):E425-34.
- 611 20. Yu X, Lund SP, Greenwald JW, Records AH, Scott RA, Nettleton D et al. Transcriptional analysis of the global  
612 regulatory networks active in *Pseudomonas syringae* during leaf colonization. mBio. 2014;5(5):e01683-14.
- 613 21. Nobori T, Velásquez AC, Wu J, Kvitko BH, Kremer JM, Wang Y et al. Transcriptome landscape of a bacterial  
614 pathogen under plant immunity. Proceedings of the National Academy of Sciences. 2018;115(13):E3055-E64.
- 615 22. Templeton MD, Warren BA, Andersen MT, Rikkerink EHA, Fineran PC. Complete DNA sequence of  
616 *Pseudomonas syringae* pv. *actinidiae*, the causal agent of Kiwifruit canker disease. Genome Announcements.  
617 2015;3(5).
- 618 23. Liu P, Si Y: Cluster analysis of RNA-sequencing data. In: Statistical Analysis of Next Generation Sequencing  
619 Data. Edited by Datta S, Nettleton D. Cham: Springer International Publishing; 2014: 191-217.
- 620 24. Lee S, Seo CH, Lim B, Yang JO, Oh J, Lim M et al. Accurate quantification of transcriptome from RNA-Seq data  
621 by effective length normalization Nucleic Acids Research. 2011;39(2):e9.
- 622 25. Mercier J, Lindow SE. Role of leaf surface sugars in colonization of plants by bacterial epiphytes. Applied and  
623 Environmental Microbiology. 2000;66(1):369-74.
- 624 26. McKellar JLO, Minnell JJ, Gerth ML. A high-throughput screen for ligand binding reveals the specificities of  
625 three amino acid chemoreceptors from *Pseudomonas syringae* pv. *actinidiae*. Molecular Microbiology.  
626 2015;96(4):694-707.
- 627 27. Kostiuk B, Unterweger D, Provenzano D, Pukatzki S. T6SS intraspecific competition orchestrates *Vibrio*  
628 *cholerae* genotypic diversity. Int Microbiol. 2017;20(3):130-7.
- 629 28. Ho Brian T, Dong Tao G, Mekalanos John J. A view to a kill: The bacterial type VI secretion system. Cell Host &  
630 Microbe. 2014;15(1):9-21.
- 631 29. Russell AB, Peterson SB, Mougous JD. Type VI secretion system effectors: poisons with a purpose. Nat Rev  
632 Micro. 2014;12(2):137-48.
- 633 30. Roine E, Wei W, Yuan J, Nurmiäho-Lassila EL, Kalkkinen N, M. R et al. Hrp pilus: an hrp-dependent bacterial  
634 surface appendage produced by *Pseudomonas syringae* pv. *tomato* DC3000. Proc Natl Acad Sci USA.  
635 1997;94(7):3459-64.
- 636 31. Sohn KH, Saucet SB, Clarke CR, Vinatzer BA, O'Brien HE, Guttman DS et al. HopAS1 recognition significantly  
637 contributes to Arabidopsis nonhost resistance to *Pseudomonas syringae* pathogens. The New phytologist.  
638 2012;193(1):58-66.
- 639 32. Mucyn TS, Yourstone S, Lind AL, Biswas S, Nishimura MT, Baltrus DA et al. Variable suites of non-effector  
640 genes are co-regulated in the type III secretion virulence regulon across the *Pseudomonas syringae* phylogeny.  
641 PLoS pathogens. 2014;10(1):e1003807.
- 642 33. Marchler-Bauer A, Bo Y, Han L, He J, Lanczycki CJ, Lu S et al. CDD/SPARCLE: functional classification of proteins  
643 via subfamily domain architectures. Nucleic Acids Research. 2017;45(Database issue):D200-D3.
- 644 34. Marchler-Bauer A, Derbyshire MK, Gonzales NR, Lu S, Chitsaz F, Geer LY et al. CDD: NCBI's conserved domain  
645 database. Nucleic Acids Res. 2015;43(Database issue):D222-6.
- 646 35. Weigele BA, Orchard RC, Jimenez A, Cox GW, Alto NM. A systematic exploration of the interactions between  
647 bacterial effector proteins and host cell membranes. Nature Communications. 2017;8:532.

- 648 36. Choi S, Jayaraman J, Segonzac C, Park H-J, Park H, Han S-W et al. *Pseudomonas syringae* pv. *actinidiae* type III  
649 effectors localized at multiple cellular compartments activate or suppress innate immune responses in  
650 *Nicotiana benthamiana*. *Frontiers in Plant Science*. 2017;8(2157).
- 651 37. Glass NL, Kosuge T. Cloning of the gene for indoleacetic acid-lysine synthetase from *Pseudomonas syringae*  
652 subsp. *savastanoi*. *Journal of Bacteriology*. 1986;166(2):598-603.
- 653 38. Ostrowski M, Mierek-Adamska A, Porowińska D, Goc A, Jakubowska A. Cloning and biochemical  
654 characterization of indole-3-acetic acid-amino acid synthetase PsGH3 from pea. *Plant Physiology and*  
655 *Biochemistry*. 2016;1079-20.
- 656 39. Spena A, Prinsen E, Fladung M, Schulze SC, Van Onckelen H. The indoleacetic acid-lysine synthetase gene of  
657 *Pseudomonas syringae* subsp. *savastanoi* induces developmental alterations in transgenic tobacco and potato  
658 plants. *Mol Gen Genet*. 1991;227(2):205-12.
- 659 40. Castillo-Lizardo MG, Aragón IM, Carvajal V, Matas IM, Pérez-Bueno ML, Gallegos M-T et al. Contribution of the  
660 non-effector members of the HrpL regulon, *iaaL* and *matE*, to the virulence of *Pseudomonas syringae* pv.  
661 *tomato* DC3000 in tomato plants. *BMC Microbiology*. 2015;15165.
- 662 41. Franklin MJ, Nivens DE, Weadge JT, Howell PL. Biosynthesis of the *Pseudomonas aeruginosa* extracellular  
663 polysaccharides, alginate, pel, and psl. *Frontiers in Microbiology*. 2011;2167.
- 664 42. Ghafoor A, Hay ID, Rehm BHA. Role of exopolysaccharides in *Pseudomonas aeruginosa* biofilm formation and  
665 architecture. *Applied and Environmental Microbiology*. 2011;77(15):5238-46.
- 666 43. Markel E, Stodghill P, Bao Z, Myers CR, Swingle B. AlgU controls expression of virulence genes in *Pseudomonas*  
667 *syringae* pv. *tomato* DC3000. *Journal of Bacteriology*. 2016;198(17):2330-44.
- 668 44. Weber T, Blin K, Duddela S, Krug D, Kim HU, Bruccoleri R et al. antiSMASH 3.0—a comprehensive resource for  
669 the genome mining of biosynthetic gene clusters. *Nucleic Acids Research*. 2015;43(W1):W237-W43.
- 670 45. Alshim AS, Taylor TB, Barrett GA, Gallie J, Zhang X-X, Altamirano-Junqueira AE et al. The biosurfactant  
671 viscosin produced by *Pseudomonas fluorescens* SBW25 aids spreading motility and plant growth promotion.  
672 *Environmental Microbiology*. 2014;16(7):2267-81.
- 673 46. Hockett KL, Burch AY, Lindow SE. Thermo-regulation of genes mediating motility and plant interactions in  
674 *Pseudomonas syringae*. *PLOS ONE*. 2013;8(3):e59850.
- 675 47. Burch AY, Shimada BK, Browne PJ, Lindow SE. Novel high-throughput detection method to assess bacterial  
676 surfactant production. *Applied and Environmental Microbiology*. 2010;76(16):5363-72.
- 677 48. Burch AY, Shimada BK, Mullin SWA, Dunlap CA, Bowman MJ, Lindow SE. *Pseudomonas syringae* coordinates  
678 production of a motility-enabling surfactant with flagellar assembly. *Journal of Bacteriology*.  
679 2012;194(6):1287-98.
- 680 49. Patel HK, Ferrante P, Covaceuszach S, Lamba D, Scortichini M, Venturi V. The kiwifruit emerging pathogen  
681 *Pseudomonas syringae* pv. *actinidiae* does not produce AHLs but possesses three luxR solos. *PLoS One*.  
682 2014;9(1):e87862.
- 683 50. Green ER, Meccas J. Bacterial secretion systems – an overview. *Microbiology spectrum*.  
684 2016;4(1):10.1128/microbiolspec.VMBF-0012-2015.
- 685 51. Shindo T, Kaschani F, Yang F, Kovács J, Tian F, Kourelis J et al. Screen of non-annotated small secreted proteins  
686 of *Pseudomonas syringae* reveals a virulence factor that inhibits Tomato immune proteases. *PLoS pathogens*.  
687 2016;12(9):e1005874.
- 688 52. Petersen TN, Brunak S, von Heijne G, Nielsen H. SignalP 4.0: discriminating signal peptides from  
689 transmembrane regions. *Nature Methods*. 2011;8:785.
- 690 53. Xin XF, Nomura K, Aung K, Velasquez AC, Yao J, Boutrot F et al. Bacteria establish an aqueous living space in  
691 plants crucial for virulence. *Nature*. 2016;539(7630):524-9.

- 692 54. Xin X-F, Kvitko B, He SY. *Pseudomonas syringae*: what it takes to be a pathogen. Nature Reviews Microbiology.  
693 2018.
- 694 55. Mesarich CH, Rees-George J, Gardner PP, Ghomi FA, Gerth ML, Andersen MT et al. Transposon insertion  
695 libraries for the characterization of mutants from the kiwifruit pathogen *Pseudomonas syringae* pv. *actinidiae*.  
696 PLOS ONE. 2017;12(3):e0172790.
- 697 56. Barquist L, Mayho M, C. C, Cain AK, Boinett CJ, Page AJ et al. The TraDIS toolkit: sequencing and analysis for  
698 dense transposon mutant libraries. Bioinformatics. 2016;32(7):1109-11.
- 699 57. Bertani G. Studies on lysogenesis. I. The mode of phage liberation by lysogenic *Escherichia coli*. J Bacteriol.  
700 1951;62(3):293-3000.
- 701 58. Ishiga Y, Ishiga T, Uppalapati SR, Mysore KS. Arabidopsis seedling flood-inoculation technique: a rapid and  
702 reliable assay for studying plant-bacterial interactions. . 2011;7:32. Plant Methods. 2011;732.
- 703 59. Hoitink HAJ, Sinden SL. Partial purification and properties of chlorosis inducing toxins of *Pseudomonas*  
704 *phaseolicola* and *Pseudomonas glycinea*. Phytopathology. 1970;60:1236-7.
- 705 60. Bolger AM, Lohse M, Usadel B. Trimmomatic: A flexible trimmer for Illumina sequence data. Bioinformatics.  
706 2014;30(15):2114-20.
- 707 61. Langmead B, Trapnell C, Pop M, Salzberg SL. Ultrafast and memory-efficient alignment of short DNA  
708 sequences to the human genome. Genome Biol 2009;10(3):R25.
- 709 62. Warnes GR, Bolker B, Bonebakker L, Gentleman R, Wolfgang Huber W, Liaw A et al. gplots: various R  
710 programming tools for plotting data. R package version 301 2016.
- 711 63. Le S, Josse J, F. H. FactoMineR: An R package for multivariate analysis. Journal of Statistical Software.  
712 2008;25(1):1-18.
- 713 64. Kassambara A, Mundt F. factoextra: extract and visualize the results of multivariate data analyses. R package  
714 version 105. 2017.
- 715 65. Love MI, Huber W, Anders S. Moderated estimation of fold change and dispersion for RNA-seq data with  
716 DESeq2. Genome Biology. 2014;15(12):550.
- 717 66. Sayers EW, Barrett T, Benson DA, Bolton E, Bryant SH, Canese K et al. Database resources of the National  
718 Center for Biotechnology Information. Nucleic Acids Res. 2012;40(Database issue):D13-25.
- 719
- 720
- 721

722 Table 1. k-means clustering of 4243 genes Psa into 13 clades. HPI, hours post infection.

| Group | k-means clade | Number of genes | Description                                                | Expression Phase |
|-------|---------------|-----------------|------------------------------------------------------------|------------------|
| 1     | 1 & 13        | 1137            | Constitutively expressed genes                             | N/A              |
| 2     | 2,3, & 4      | 1323            | Genes down-regulated <i>in planta</i>                      | N/A              |
| 3     | 5             | 815             | Little differential expression compared to <i>in vitro</i> | N/A              |
| 4     | 6, 10 & 11    | 311             | Genes upregulated (3-24 HPI) <i>in planta</i>              | Mid              |
| 5     | 7,8, & 9      | 550             | Genes upregulated late (48-120 HPI) <i>in planta</i>       | Late             |
| 6     | 12            | 107             | Early upregulated (1.5-3 HPI) genes <i>in planta</i>       | Early            |

723

724



725 Figure Legends

726

727 Figure 1. Time course of *Pseudomonas syringae* pv. *actinidiae* (*Psa*) infection of kiwifruit  
728 plantlets over 14 days. CFU, colony forming units; DPI, days post inoculation. (●)  
729 surface-sterilized (■) non-surface sterilized. The experiment was duplicated and each  
730 had four technical replicates. Error bars represent SE, n=2. Zero-time controls had no  
731 *Psa* present.

732

733 Figure 2. Principal component analysis plot (PCA) showing the clustering of vst (variance  
734 stabilizing transformation) transcriptomic data. In the left plot data points are colored by  
735 treatment time point (1.5 HPI, 3 HPI, 6 HPI, 12 HPI, 24 HPI, 48 HPI, 72 HPI, 96 HPI and  
736 120 HPI). In the right plot data points are colored by infection phase (*in vitro*, Early (1.5-3  
737 HPI), Mid (6-24 HPI), Late (48-120 HPI)). HPI, hours post infection.

738

739 Figure 3. Heatmap and k-means clustering showing the expression of *Pseudomonas*  
740 *syringae* pv. *actinidiae* (*Psa*) genes in 'Hort16A' kiwifruit plantlets post infection. Similar  
741 expression profiles were clustered into 13 distinct groups by k-means. Line graphs  
742 displaying the prototype mean expression of each cluster are included on the right.

743

744 Figure 4. Expression of genes encoding *IAA1* and *Mate*. *DNAA* was included as a  
745 constitutively expressed control.

746

747 Figure 5. Expression of genes from the plasmid-borne operon coding for a putative  
748 aromatic compound.

749

750 Figure S1. Experimental design of RNA-seq sampling.

751

752

753 Figure 1.

754

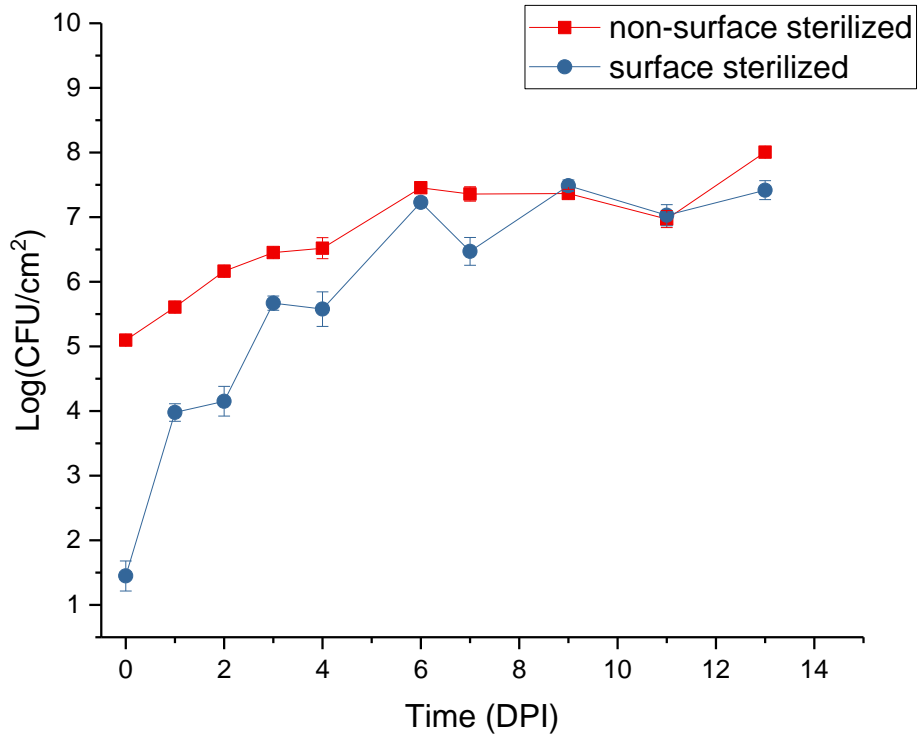

755

756

757

758

759

760

761

762

763

764

765

766 Figure 2.

767

768

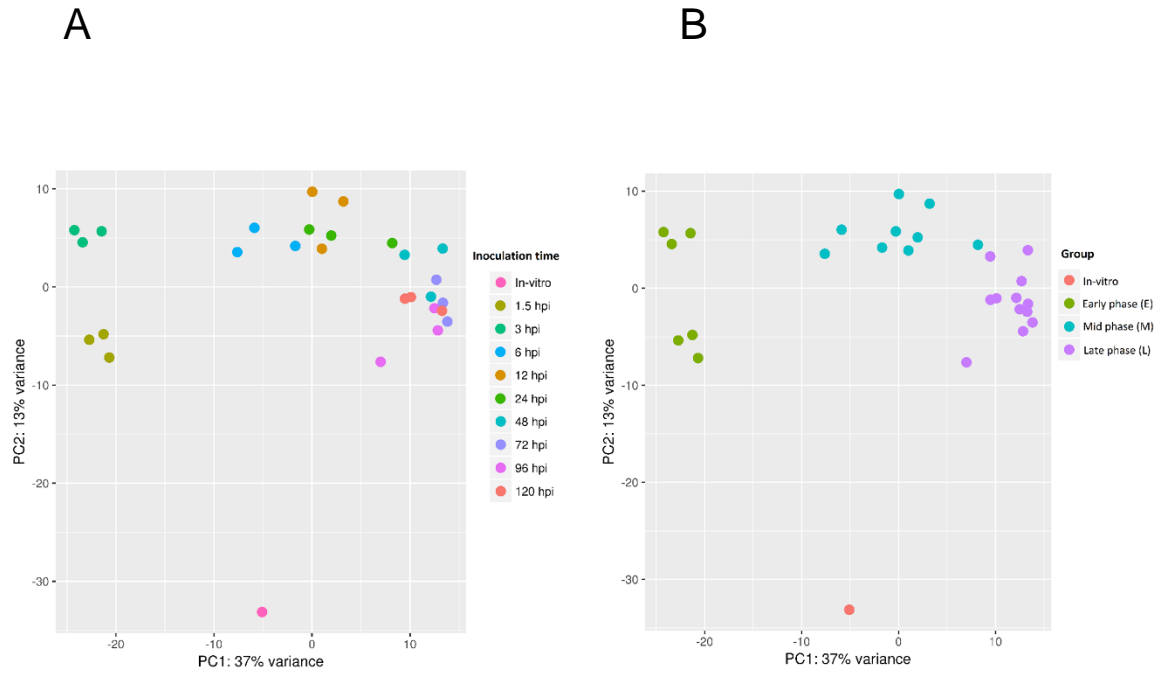

769

770

771 Figure 3.  
772

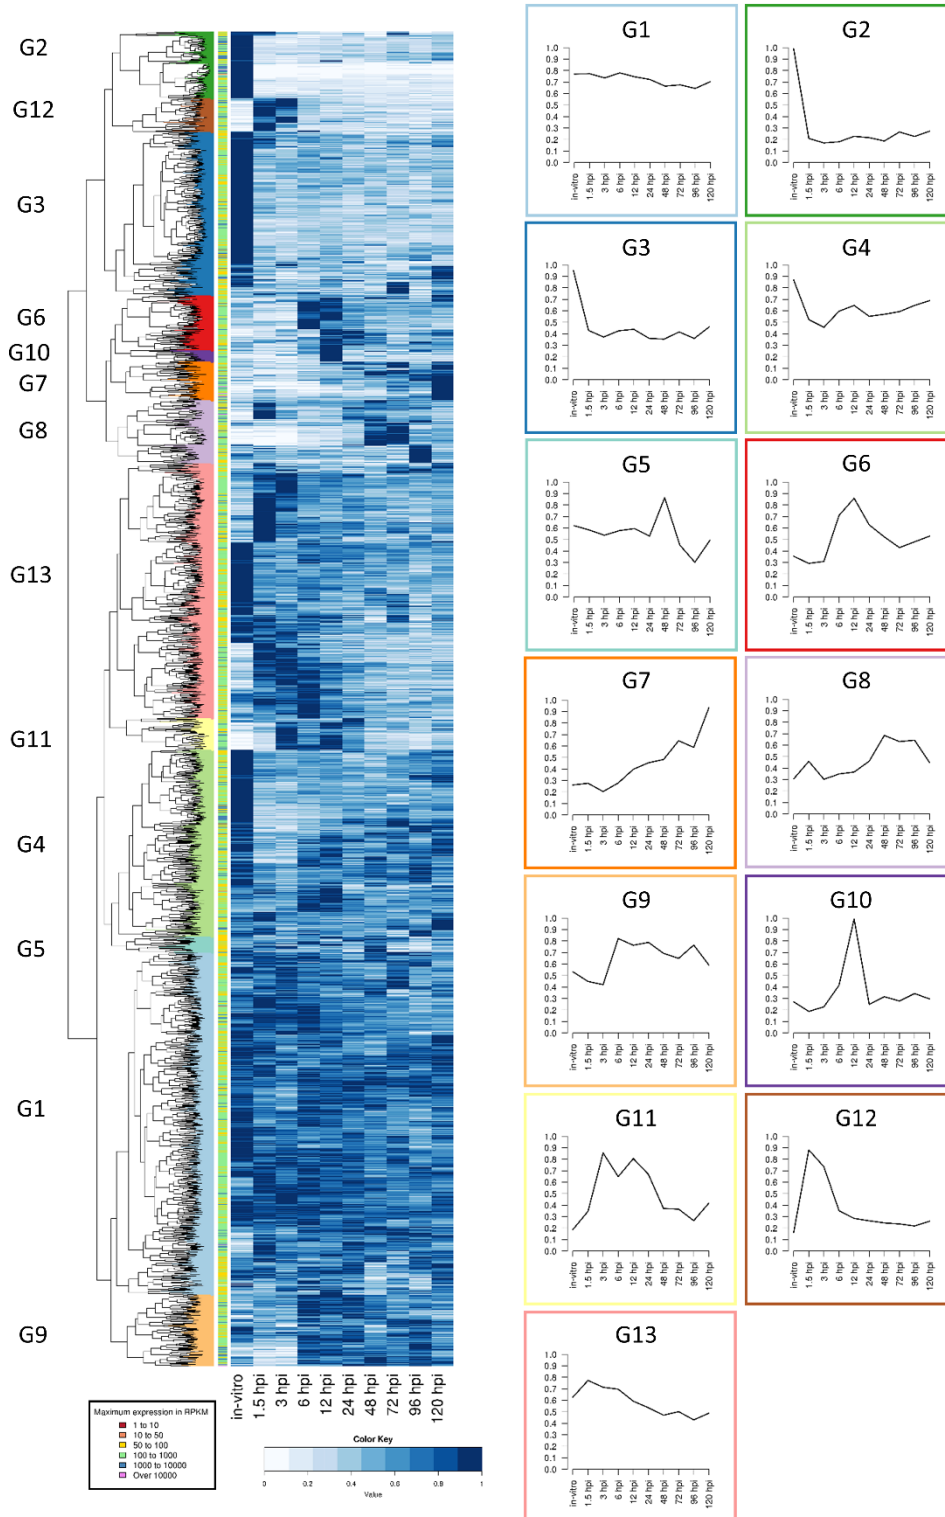

773

774 Figure 4.

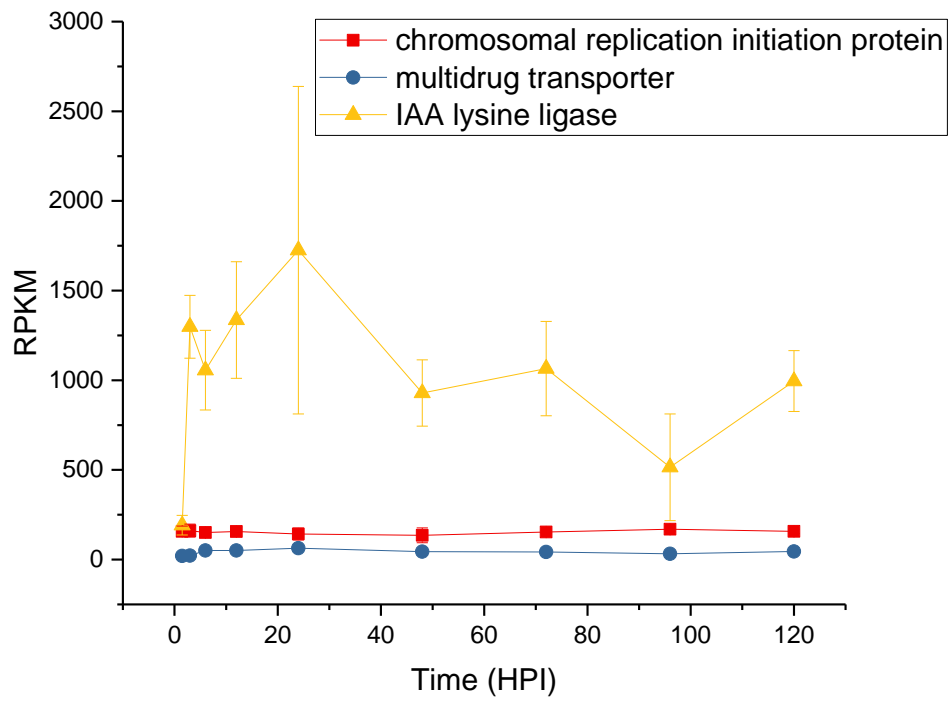

775

776

777 Figure 5.

778

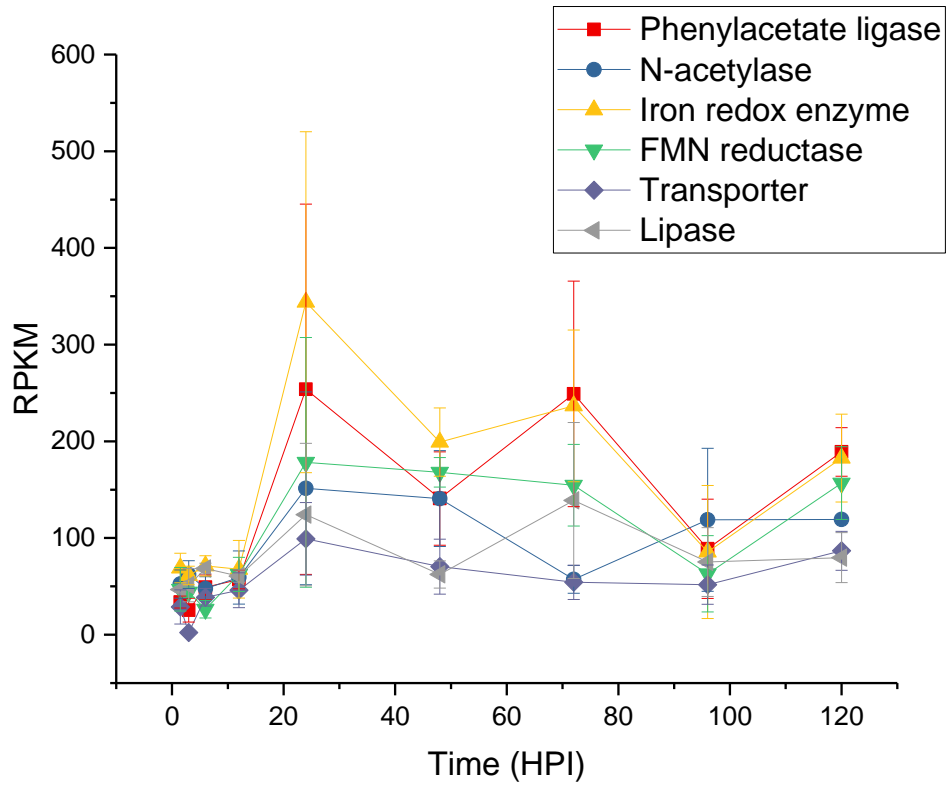

779

780

781 Supplementary Figures

782 Figure S1. RNA-seq experimental design

783

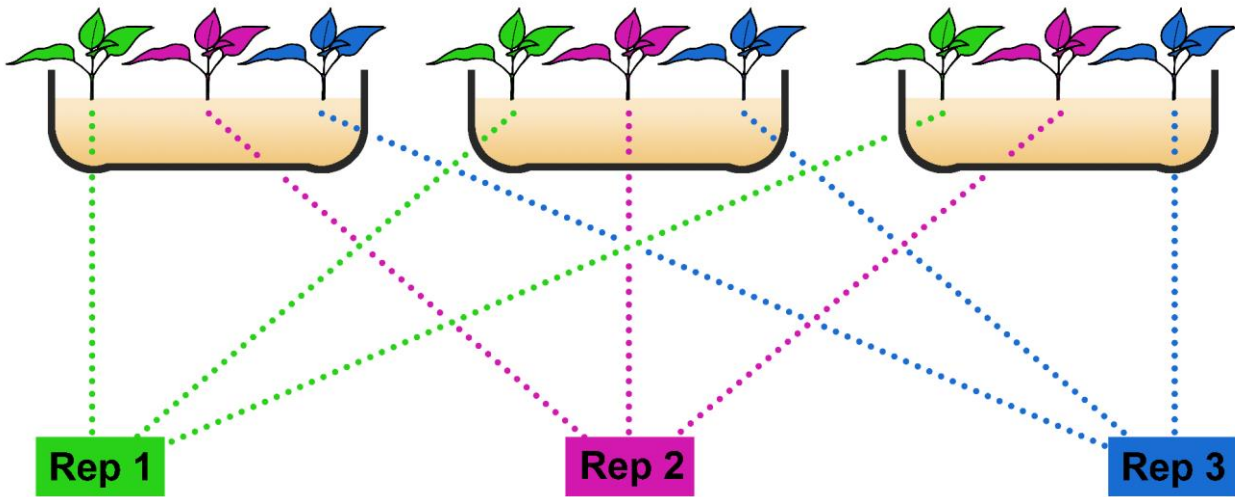

784

785

786

787

788

789

790

791

792

793

794

795

796

797

798

799

800

801

802 Table S1. RPKM for all genes

803



804 Table S2. Early induced genes ranked by the ratio of expression at 3 HPI compared with *in*  
 805 *vitro* (cutoff 5-fold). HPI, hours post infection.  
 806

| Gene ID    | Gene Annotation                                      | 3 HPI/ <i>in vitro</i> |
|------------|------------------------------------------------------|------------------------|
| IYO_011995 | phosphate ABC transporter substrate-binding protein  | 148.8                  |
| IYO_012000 | phosphate ABC transporter permease                   | 43.7                   |
| IYO_019585 | thioredoxin                                          | 31.4                   |
| IYO_012010 | phosphate ABC transporter ATP-binding protein        | 30.8                   |
| IYO_018790 | magnesium transporter CorA                           | 30.8                   |
| IYO_027385 | ABC transporter substrate-binding protein            | 29.5                   |
| IYO_027390 | GntR family transcriptional regulator                | 25.0                   |
| IYO_015395 | hypothetical protein                                 | 23.9                   |
| IYO_006115 | amino acid ABC transporter substrate-binding protein | 23.3                   |
| IYO_027380 | ABC transporter permease                             | 21.5                   |
| IYO_028665 | phosphate-binding protein                            | 20.4                   |
| IYO_018545 | acid phosphatase                                     | 19.5                   |
| IYO_000970 | ammonia channel protein                              | 18.7                   |
| IYO_006555 | chemotaxis protein                                   | 17.4                   |
| IYO_021410 | short-chain dehydrogenase                            | 17.2                   |
| IYO_013555 | type VI secretion effector protein (Hcp)             | 16.3                   |
| IYO_013560 | EvpB family type VI secretion protein                | 15.9                   |
| IYO_028645 | transcriptional regulator PhoU                       | 14.3                   |
| IYO_002185 | peptidase M19                                        | 13.6                   |
| IYO_010675 | phosphatase                                          | 12.6                   |
| IYO_021050 | ABC transporter substrate-binding protein            | 12.5                   |
| IYO_013550 | Type VI secretion protein                            | 12.2                   |
| IYO_013565 | type VI secretion protein                            | 11.7                   |
| IYO_001685 | MFS transporter                                      | 11.6                   |
| IYO_021420 | polysaccharide deacetylase                           | 10.9                   |
| IYO_020035 | ABC transporter substrate-binding protein            | 10.8                   |
| IYO_027365 | metallophosphatase                                   | 10.4                   |
| IYO_014740 | sugar ABC transporter substrate-binding protein      | 10.2                   |
| IYO_002190 | hydrocarbon binding protein                          | 9.8                    |
| IYO_020310 | hypothetical protein                                 | 9.7                    |
| IYO_013545 | type VI secretion system protein ImpG                | 9.5                    |
| IYO_006130 | glutamine ABC transporter ATP-binding protein        | 9.4                    |
| IYO_028615 | transcriptional regulator PhoB                       | 9.2                    |
| IYO_004270 | chemotaxis protein                                   | 9.1                    |
| IYO_001975 | nitrogen regulation protein NR(I)                    | 9.1                    |
| IYO_002205 | electron transfer flavoprotein subunit alpha         | 8.8                    |
| IYO_025185 | urease accessory protein UreG                        | 8.7                    |

|                   |                                                                     |     |
|-------------------|---------------------------------------------------------------------|-----|
| <b>IYO_021405</b> | 3-oxoacyl-ACP reductase                                             | 8.5 |
| <b>IYO_026920</b> | ABC transporter permease                                            | 8.5 |
| <b>IYO_006120</b> | amino acid ABC transporter permease                                 | 7.5 |
| <b>IYO_002210</b> | electron transfer flavoprotein subunit beta                         | 7.4 |
| <b>IYO_027370</b> | iron ABC transporter substrate-binding protein                      | 7.3 |
| <b>IYO_027375</b> | ABC transporter permease                                            | 6.8 |
| <b>IYO_018365</b> | MFS transporter                                                     | 6.6 |
| <b>IYO_014745</b> | xylose isomerase                                                    | 6.3 |
| <b>IYO_018070</b> | ATPase                                                              | 6.2 |
| <b>IYO_006260</b> | acetyltransferase                                                   | 6.0 |
| <b>IYO_027495</b> | sarcosine oxidase subunit alpha                                     | 5.9 |
| <b>IYO_001120</b> | hypothetical protein                                                | 5.8 |
| <b>IYO_026150</b> | acyl carrier protein                                                | 5.6 |
| <b>IYO_004585</b> | branched-chain amino acid ABC transporter substrate-binding protein | 5.6 |
| <b>IYO_009210</b> | quercetin 2,3-dioxygenase                                           | 5.5 |
| <b>IYO_014735</b> | xylose transporter                                                  | 5.5 |
| <b>IYO_025180</b> | urease accessory protein UreF                                       | 5.5 |
| <b>IYO_021415</b> | MFS transporter                                                     | 5.2 |

807

808

809 Table S3. Genes most highly upregulated in the mid phase of the infection time course  
 810 (3-24 hours post infection). Genes are ranked on the ratio of maximum Reads Per  
 811 Kilobase per Million reads over that time period to *in vitro* expression (cutoff 5-fold).  
 812

| Gene ID    | Gene Annotation                        | Ratio |
|------------|----------------------------------------|-------|
| IYO_006750 | type III effector HrpW                 | 257.8 |
| IYO_022020 | hemolysin                              | 177.0 |
| IYO_006820 | type III secretion protein             | 118.7 |
| IYO_006755 | Shc Hop M1 (disrupted)                 | 104.3 |
| IYO_006865 | type III secretion system protein      | 77.2  |
| IYO_006790 | HrpA1                                  | 77.0  |
| IYO_004052 | HopS2                                  | 76.4  |
| IYO_006825 | type III secretion protein             | 67.6  |
| IYO_006875 | type III secretion protein             | 63.0  |
| IYO_006880 | type III secretion protein             | 54.1  |
| IYO_006795 | type III secretion protein HrpZ        | 52.4  |
| IYO_012110 | Ais protein                            | 52.2  |
| IYO_006905 | RNA polymerase sigma factor HrpL       | 50.3  |
| IYO_022025 | glycerol acyltransferase               | 47.3  |
| IYO_004050 | type III chaperone ShcO1               | 44.3  |
| IYO_006830 | secretin                               | 44.3  |
| IYO_028770 | LysR family transcriptional regulator  | 44.2  |
| IYO_003325 | copper resistance protein CopZ         | 41.4  |
| IYO_006910 | type III effector HrpK                 | 39.6  |
| IYO_012005 | phosphate ABC transporter permease     | 37.7  |
| IYO_002060 | IAA lysine ligase                      | 36.0  |
| IYO_006420 | chemotaxis protein                     | 35.7  |
| IYO_014395 | lytic transglycosylase                 | 31.2  |
| IYO_006890 | type III secretion protein             | 30.5  |
| IYO_014235 | hypothetical protein                   | 30.4  |
| IYO_006860 | type III secretion system protein SsaR | 30.3  |
| IYO_006870 | type III secretion system protein      | 29.4  |
| IYO_006815 | type III secretion protein             | 29.0  |
| IYO_005735 | glycoside hydrolase                    | 25.9  |
| IYO_006900 | type III secretion protein HrpJ        | 25.2  |
| IYO_003725 | type III chaperone protein ShcF        | 23.8  |
| IYO_006800 | type III secretion protein             | 23.3  |
| IYO_020425 | AvrPto5                                | 23.3  |
| IYO_006810 | type III secretion protein             | 22.4  |
| IYO_006805 | type III secretion protein             | 22.1  |
| IYO_006885 | ATP synthase                           | 21.2  |
| IYO_006855 | type III secretory protein EscS        | 20.9  |

|            |                                                       |      |
|------------|-------------------------------------------------------|------|
| IYO_006765 | type III chaperone ShcE                               | 18.7 |
| IYO_006760 | HopM1                                                 | 18.2 |
| IYO_014245 | membrane protein                                      | 18.0 |
| IYO_003570 | avrD1                                                 | 18.0 |
| IYO_029290 | type III chaperone protein ShcF                       | 17.8 |
| IYO_006850 | type III secretion system protein                     | 17.5 |
| IYO_029040 | type III secretion chaperone CesT                     | 16.9 |
| IYO_008282 | HopZ5                                                 | 16.8 |
| IYO_009200 | hypothetical protein                                  | 16.7 |
| IYO_005160 | HopI1                                                 | 16.6 |
| IYO_012125 | diguanylate cyclase                                   | 16.1 |
| IYO_006895 | type III secretion protein HrpI                       | 15.5 |
| IYO_003600 | AvrB4                                                 | 15.5 |
| IYO_022140 | SAM-dependent methyltransferase                       | 14.6 |
| IYO_012120 | AraC family transcriptional regulator                 | 13.9 |
| IYO_002045 | hypothetical protein                                  | 13.8 |
| IYO_017375 | phosphonate/organophosphate ester transporter subunit | 13.2 |
| IYO_018555 | HopAZ1                                                | 12.9 |
| IYO_012115 | XRE family transcriptional regulator                  | 12.2 |
| IYO_006745 | HopAA1-1                                              | 11.9 |
| IYO_028535 | NADP transhydrogenase subunit alpha                   | 11.7 |
| IYO_008285 | HopH1                                                 | 11.5 |
| IYO_008065 | AvrRpm1                                               | 11.4 |
| IYO_010805 | LuxR family transcriptional regulator                 | 11.4 |
| IYO_029795 | HopAU1                                                | 10.9 |
| IYO_006770 | AvrE1                                                 | 10.8 |
| IYO_003720 | HopAO2                                                | 10.7 |
| IYO_000845 | HopY1                                                 | 10.7 |
| IYO_012140 | protein tolQ                                          | 10.3 |
| IYO_006250 | tail protein                                          | 10.1 |
| IYO_022695 | alkaline phosphatase                                  | 9.8  |
| IYO_009265 | serine/threonine protein phosphatase                  | 9.4  |
| IYO_016255 | Ais protein                                           | 9.2  |
| IYO_024150 | HopR1                                                 | 9.0  |
| IYO_009660 | hypothetical protein                                  | 8.9  |
| IYO_027435 | DNA polymerase III subunit epsilon                    | 8.4  |
| IYO_012610 | MarR family transcriptional regulator                 | 8.4  |
| IYO_013150 | HopBN1                                                | 8.0  |
| IYO_002040 | hypothetical protein                                  | 8.0  |
| IYO_027360 | transcriptional initiation protein Tat                | 8.0  |
| IYO_012030 | nitrite reductase                                     | 7.7  |

|            |                                                               |     |
|------------|---------------------------------------------------------------|-----|
| IYO_013145 | type III chaperone protein ShcF                               | 7.7 |
| IYO_028955 | nitrate ABC transporter ATP-binding protein                   | 7.7 |
| IYO_003727 | HopBB1-1                                                      | 7.7 |
| IYO_012145 | biopolymer transporter TolR                                   | 7.5 |
| IYO_029288 | AvrRpm2 (frameshifts)                                         | 7.5 |
| IYO_003315 | metal ABC transporter ATPase                                  | 7.5 |
| IYO_028380 | type III chaperone protein ShcA                               | 7.5 |
| IYO_000385 | dodecin flavoprotein                                          | 7.5 |
| IYO_006845 | type III secretion system protein                             | 7.4 |
| IYO_028960 | sulfonate ABC transporter permease                            | 7.3 |
| IYO_014240 | hypothetical                                                  | 7.2 |
| IYO_023505 | chemotaxis protein                                            | 7.1 |
| IYO_028540 | NAD(P) transhydrogenase                                       | 7.0 |
| IYO_005855 | UDP-N-acetylglucosamine 2-epimerase                           | 6.8 |
| IYO_001870 | hypothetical protein                                          | 6.8 |
| IYO_013690 | membrane protein                                              | 6.7 |
| IYO_010630 | thiamine biosynthesis protein ApbE                            | 6.6 |
| IYO_003680 | HopAF1                                                        | 6.6 |
| IYO_023400 | energy transducer TonB                                        | 6.4 |
| IYO_011020 | chemotaxis protein                                            | 6.4 |
| IYO_029045 | HopZ3                                                         | 6.3 |
| IYO_023390 | biopolymer transporter ExbB                                   | 6.2 |
| IYO_024520 | voltage-gated chloride channel protein                        | 5.9 |
| IYO_009335 | Fe-S oxidoreductase                                           | 5.8 |
| IYO_024535 | hypothetical protein                                          | 5.8 |
| IYO_004060 | hypothetical protein                                          | 5.7 |
| IYO_021665 | MFS transporter                                               | 5.7 |
| IYO_016185 | UDP-4-amino-4-deoxy-L-arabinose-oxoglutarate aminotransferase | 5.5 |
| IYO_020420 | iron ABC transporter permease                                 | 5.5 |
| IYO_022135 | InaA protein                                                  | 5.5 |
| IYO_007455 | membrane protein                                              | 5.3 |
| IYO_016195 | UDP-4-amino-4-deoxy-L-arabinose formyltransferase             | 5.3 |
| IYO_022030 | ACP phosphodiesterase                                         | 5.2 |
| IYO_006775 | lytic transglycosylase                                        | 5.2 |
| IYO_004045 | lipoprotein                                                   | 5.1 |
| IYO_018725 | membrane protein                                              | 5.1 |
| IYO_012605 | fusaric acid resistance protein                               | 5.1 |
| IYO_004240 | hypothetical protein                                          | 5.0 |
| IYO_014250 | chemotaxis protein CheY                                       | 5.0 |

814 Table S4. Expression levels of individual *Psa* effectors over the infection time course.  
 815 Effectors are ranked by the highest level of expression between 3 and 12 HPI in Reads  
 816 Per Kilobase per Million reads. Effectors likely to be disrupted or pseudogenes were not  
 817 included. HPI, hours post infection. ND = not determined.  
 818

| Gene ID    | Effector | Heat map group | RPKM            |         |        |        |        |        |        |        |        |         |
|------------|----------|----------------|-----------------|---------|--------|--------|--------|--------|--------|--------|--------|---------|
|            |          |                | <i>in vitro</i> | 1.5 HPI | 3 HPI  | 6 HPI  | 12 HPI | 24 HPI | 48 HPI | 72 HPI | 96 HPI | 120 HPI |
| IYO_029795 | HopAU1   | 11             | 346.4           | 970.6   | 3772.5 | 2876.6 | 3196.1 | 2141.7 | 1138.8 | 952.1  | 619.7  | 946.2   |
| IYO_008065 | AvrRpm1  | 11             | 123.9           | 365.5   | 1293.2 | 867.8  | 1415.6 | 940.2  | 538.8  | 542.9  | 526.2  | 693.6   |
| IYO_020425 | AvrPto5  | 11             | 58.8            | 331     | 1198.8 | 920.8  | 1368.6 | 770.7  | 472.4  | 424.3  | 281.7  | 487.2   |
| IYO_018555 | HopAZ1   | 11             | 102.1           | 226.8   | 995    | 616.3  | 1320.1 | 1178.3 | 479.8  | 682.5  | 464.8  | 788     |
| IYO_004052 | HopS2    | 11             | 15              | 181.7   | 1145.3 | 751.5  | 762.2  | 494.6  | 324.2  | 239.9  | 129    | 226.5   |
| IYO_003720 | HopAO2   | 11             | 102.7           | 346.6   | 1102.7 | 664.4  | 821.5  | 560.7  | 357.2  | 378.4  | 228.5  | 356.7   |
| IYO_003600 | AvrB4    | 11             | 65.6            | 326.8   | 925.5  | 696.7  | 1015.7 | 621.4  | 332.6  | 431.6  | 251.2  | 465.3   |
| IYO_013150 | HopBN1   | 11             | 105.3           | 179.4   | 633    | 468.2  | 843.7  | 622.5  | 327.7  | 440.3  | 232.6  | 342.3   |
| IYO_008282 | HopZ5    | 11             | 43.4            | 314.1   | 662.1  | 546.9  | 727.8  | 426.2  | 222    | 186.1  | 141.9  | 440.9   |
| IYO_003570 | avrD1    | 6              | 38.2            | 99.4    | 432.1  | 412.6  | 687.1  | 492.6  | 240.1  | 419.9  | 264.3  | 703.8   |
| IYO_024217 | HopF2    | 11             | 187.9           | 225.4   | 658.8  | 479.4  | 649.8  | 563.5  | 288    | 400.6  | 213.4  | 403     |
| IYO_003657 | HopAW1   | 11             | 195             | 166.1   | 401.6  | 375.5  | 539    | 402.8  | 208.9  | 254.2  | 187    | 361.9   |
| IYO_006735 | HopN1    | 7              | 200.4           | 301.6   | 380.7  | 510.9  | 478.6  | 467.8  | 383.2  | 394.1  | 347.3  | 314.1   |

|            |        |    |      |       |       |       |       |       |       |       |       |       |
|------------|--------|----|------|-------|-------|-------|-------|-------|-------|-------|-------|-------|
| IYO_008285 | HopH1  | 11 | 43.1 | 147.6 | 493.5 | 241.2 | 462.3 | 284.1 | 135.7 | 158.6 | 80.9  | 177.6 |
| IYO_000845 | HopY1  | 11 | 42.8 | 121.7 | 426.6 | 279.2 | 459.5 | 317   | 172.9 | 238.8 | 115.9 | 204.8 |
| IYO_005160 | HopI1  | 11 | 22.3 | 96.9  | 370   | 246.3 | 367   | 324.7 | 169.6 | 217.6 | 143.6 | 181.2 |
| IYO_006760 | HopM1  | 11 | 20.3 | 106.4 | 368.9 | 286.3 | 347.5 | 186.1 | 98.1  | 102.9 | 69.2  | 114.3 |
| IYO_003727 | HopBB1 | 11 | 47.3 | 103.6 | 362.9 | 266.3 | 232.3 | 173.2 | 76.2  | 107   | 143.6 | 100.6 |
|            | -1     |    |      |       |       |       |       |       |       |       |       |       |
| IYO_003680 | HopAF1 | 6  | 46   | 90.6  | 176.3 | 145.4 | 302.4 | 321.1 | 145.9 | 186.5 | 154.3 | 213.1 |
| IYO_029045 | HopZ3  | 11 | 47.3 | 89.7  | 248.7 | 179.1 | 300.1 | 206.6 | 111.2 | 116.5 | 84.1  | 135.8 |
| IYO_006770 | AvrE1  | 11 | 27   | 73.9  | 291.1 | 176.3 | 164.6 | 129.1 | 57.6  | 53.6  | 44.9  | 47.8  |
| IYO_003525 | HopQ1  | 11 | 53.6 | 96.9  | 165   | 163.3 | 232.5 | 146.8 | 86.5  | 131.6 | 79.6  | 168.7 |
| IYO_003530 | HopD1  | 7  | 53.5 | 99.3  | 212.3 | 184   | 229.5 | 216.6 | 156.4 | 170.4 | 124.3 | 156.3 |
| IYO_024150 | HopR1  | 11 | 24.1 | 58.5  | 217.6 | 103   | 94    | 68.1  | 77.2  | 112.8 | 45.6  | 94.9  |
| IYO_012225 | HopAE1 | 11 | 31.2 | 53.1  | 133.8 | 95.1  | 142.7 | 174.9 | 115.4 | 111.7 | 71.9  | 121.5 |
| IYO_003675 | HopBB1 | 6  | 32.1 | 40.7  | 129.6 | 67.4  | 148.5 | 104.5 | 55.6  | 50.1  | 21.9  | 136.4 |
|            | -2     |    |      |       |       |       |       |       |       |       |       |       |
| IYO_027420 | HopAS1 | 9  | 24.9 | 11.4  | 12.3  | 17.1  | 21.7  | 60.3  | 129.9 | 109.4 | 38.4  | 53.4  |
| IYO_023985 | HopAH1 | 1  | 53.5 | 111.4 | 111.3 | 110.1 | 81.9  | 93.5  | 70.5  | 82.1  | 57.6  | 42.3  |
| IYO_006745 | HopAA1 | 11 | 9.2  | 27.7  | 107.2 | 60.6  | 109.3 | 80.5  | 32.5  | 27.7  | 12.8  | 31    |
|            | -1     |    |      |       |       |       |       |       |       |       |       |       |
| IYO_003635 | HopX3* | 5  | 53.1 | 93.4  | 67.9  | 70.6  | 65.6  | 33.7  | 63.6  | 107.1 | 59.7  | 88.2  |
|            | HopAM1 | ND |      |       |       |       |       |       |       |       |       |       |
|            | -1     |    |      |       |       |       |       |       |       |       |       |       |
|            | HopAM1 | ND |      |       |       |       |       |       |       |       |       |       |
|            | -2     |    |      |       |       |       |       |       |       |       |       |       |

819

820

821 Table S5. Expression of non-effector genes with HrpL boxes. Genes are ranked by the  
822 ration of expression at 12 HPI compared with *in vitro* expression. HPI, hours post infection.  
823  
824

| Gene ID    | Gene Annotation                    | Cluster | 12 HPI/ <i>in vitro</i> |
|------------|------------------------------------|---------|-------------------------|
| IYO_002060 | IAA lysine ligase                  | 11      | 36.0                    |
| IYO_006775 | lytic transglycosylase             | 11      | 5.2                     |
| IYO_010630 | thiamine biosynthesis protein ApbE | 11      | 5                       |
| IYO_027210 | peptidase M20                      | 11      | 3.5                     |
| IYO_025425 | phosphatidylserine decarboxylase   | 11      | 3.4                     |
| IYO_002055 | multidrug transporter Mate         | 7       | 2.5                     |
| IYO_000225 | AraC transcription factor          | 8       | 1.5                     |
| IYO_008215 | Transporter                        | 1       | 1.2                     |

825  
826



827 Table S6. Genes expressed in the mid phase of infection that do not encode the T3SS or  
 828 T3SEs. Effectors were ranked by the highest level of expression between 3 and 24 HPI  
 829 compared with *in vitro* (cutoff 5-fold). HPI, hours post infection.  
 830

| Gene ID    | Gene Annotation                                       | Max 3-12 /<br><i>in vitro</i> |
|------------|-------------------------------------------------------|-------------------------------|
| IYO_022020 | hemolysin                                             | 177.0                         |
| IYO_012110 | Ais protein                                           | 52.2                          |
| IYO_022025 | glycerol acyltransferase                              | 47.3                          |
| IYO_028770 | LysR family transcriptional regulator                 | 44.2                          |
| IYO_003325 | copper resistance protein CopZ                        | 41.4                          |
| IYO_012005 | phosphate ABC transporter permease                    | 37.7                          |
| IYO_028385 | transposase                                           | 36.1                          |
| IYO_006420 | chemotaxis protein                                    | 35.7                          |
| IYO_014235 | hypothetical protein                                  | 30.4                          |
| IYO_005735 | glycoside hydrolase                                   | 25.9                          |
| IYO_014245 | membrane protein                                      | 18.0                          |
| IYO_009200 | hypothetical protein                                  | 16.7                          |
| IYO_012125 | diguanylate cyclase                                   | 16.1                          |
| IYO_022140 | SAM-dependent methyltransferase                       | 14.6                          |
| IYO_012120 | AraC family transcriptional regulator                 | 13.9                          |
| IYO_002045 | hypothetical protein                                  | 13.8                          |
| IYO_017375 | phosphonate/organophosphate ester transporter subunit | 13.2                          |
| IYO_012115 | XRE family transcriptional regulator                  | 12.2                          |
| IYO_028535 | NADP transhydrogenase subunit alpha                   | 11.7                          |
| IYO_010805 | LuxR family transcriptional regulator                 | 11.4                          |
| IYO_012140 | protein tolQ                                          | 10.3                          |
| IYO_006250 | tail protein                                          | 10.1                          |
| IYO_022695 | alkaline phosphatase                                  | 9.8                           |
| IYO_009265 | serine/threonine protein phosphatase                  | 9.4                           |
| IYO_016255 | Ais protein                                           | 9.2                           |
| IYO_009660 | hypothetical protein IYO_009660                       | 8.9                           |
| IYO_027435 | DNA polymerase III subunit epsilon                    | 8.4                           |
| IYO_012610 | MarR family transcriptional regulator                 | 8.4                           |
| IYO_002040 | hypothetical protein                                  | 8.0                           |
| IYO_027360 | transcriptional initiation protein Tat                | 8.0                           |
| IYO_012030 | nitrite reductase                                     | 7.7                           |
| IYO_028955 | nitrate ABC transporter ATP-binding protein           | 7.7                           |
| IYO_012145 | biopolymer transporter TolR                           | 7.5                           |
| IYO_003315 | metal ABC transporter ATPase                          | 7.5                           |
| IYO_000385 | dodecin flavoprotein                                  | 7.5                           |

|            |                                                               |     |
|------------|---------------------------------------------------------------|-----|
| IYO_028960 | sulfonate ABC transporter permease                            | 7.5 |
| IYO_014240 | Hypothetical protein                                          | 7.3 |
| IYO_023505 | chemotaxis protein                                            | 7.2 |
| IYO_028540 | NAD(P) transhydrogenase                                       | 7.1 |
| IYO_005855 | UDP-N-acetylglucosamine 2-epimerase                           | 7.0 |
| IYO_001870 | hypothetical protein                                          | 6.8 |
| IYO_013690 | membrane protein                                              | 6.8 |
| IYO_010630 | thiamine biosynthesis protein ApbE                            | 6.7 |
| IYO_023400 | energy transducer TonB                                        | 6.6 |
| IYO_011020 | chemotaxis protein                                            | 6.4 |
| IYO_023390 | biopolymer transporter ExbB                                   | 6.4 |
| IYO_024520 | voltage-gated chloride channel protein                        | 6.2 |
| IYO_009335 | Fe-S oxidoreductase                                           | 5.9 |
| IYO_024535 | hypothetical protein                                          | 5.8 |
| IYO_004060 | hypothetical protein IYO_004060                               | 5.8 |
| IYO_021665 | MFS transporter                                               | 5.7 |
| IYO_016185 | UDP-4-amino-4-deoxy-L-arabinose-oxoglutarate aminotransferase | 5.7 |
| IYO_020420 | iron ABC transporter permease                                 | 5.5 |
| IYO_022135 | InaA protein                                                  | 5.5 |
| IYO_007455 | membrane protein                                              | 5.5 |
| IYO_016195 | UDP-4-amino-4-deoxy-L-arabinose formyltransferase             | 5.3 |
| IYO_022030 | ACP phosphodiesterase                                         | 5.3 |
| IYO_004045 | lipoprotein                                                   | 5.2 |
| IYO_018725 | membrane protein                                              | 5.1 |
| IYO_012605 | fusaric acid resistance protein                               | 5.1 |
| IYO_004240 | hypothetical protein                                          | 5.1 |
| IYO_014250 | chemotaxis protein CheY                                       | 5.0 |

831

832

833 Table S7. Late upregulated genes. Genes were ranked based on the ratio of expression at  
 834 120 compared with 1.5 HPI. HPI, hours post infection.  
 835

| Gene ID    | Gene Annotation                                      | 120HPI RPKM/1.5 HPI RPKM |
|------------|------------------------------------------------------|--------------------------|
| IYO_016130 | ABC transporter                                      | 119.9                    |
| IYO_016135 | acyl-CoA synthetase                                  | 93.1                     |
| IYO_006065 | glycosyl transferase                                 | 75.6                     |
| IYO_013825 | alkanesulfonate monooxygenase                        | 51.2                     |
| IYO_006070 | GDP-mannose dehydrogenase                            | 51.1                     |
| IYO_009605 | Yqcl/YcgG family protein                             | 39.1                     |
| IYO_023405 | biopolymer transporter ExbD                          | 34.3                     |
| IYO_026605 | monooxygenase                                        | 33.2                     |
| IYO_017250 | energy transducer TonB                               | 28.3                     |
| IYO_017245 | biopolymer transporter ExbB                          | 28.0                     |
| IYO_027905 | transporter                                          | 26.9                     |
| IYO_016105 | acyl-CoA dehydrogenase                               | 24.8                     |
| IYO_005580 | hypothetical protein                                 | 24.2                     |
| IYO_027910 | aliphatic sulfonates transport ATP-binding subunit   | 23.7                     |
| IYO_006055 | alginate biosynthesis protein                        | 22.7                     |
| IYO_006050 | alginate regulatory protein                          | 20.0                     |
| IYO_009255 | sulfonate ABC transporter ATP-binding protein        | 19.9                     |
| IYO_006015 | mannose-1-phosphate guanylyltransferase              | 19.3                     |
| IYO_018210 | calcium-binding protein                              | 19.2                     |
| IYO_008315 | lipoprotein                                          | 18.3                     |
| IYO_016100 | acyl-CoA dehydrogenase                               | 18.2                     |
| IYO_016120 | ABC transporter permease                             | 16.7                     |
| IYO_026615 | N5,N10-methylene tetrahydromethanopterin reductase   | 16.5                     |
| IYO_015950 | polar amino acid ABC transporter permease            | 15.6                     |
| IYO_006060 | hemolysin D                                          | 15.3                     |
| IYO_006040 | alginate O-acetyltransferase                         | 15.1                     |
| IYO_026620 | methionine ABC transporter substrate-binding protein | 15.0                     |
| IYO_026625 | ABC transporter                                      | 15.0                     |
| IYO_027920 | ABC transporter substrate-binding protein            | 14.1                     |
| IYO_015300 | ABC transporter permease                             | 13.1                     |
| IYO_026675 | sulfonate ABC transporter ATP-binding protein        | 12.7                     |
| IYO_006030 | poly(beta-D-mannuronate) O-acetylase                 | 12.3                     |
| IYO_011010 | catalase                                             | 12.0                     |
| IYO_016095 | 5,10-methylene tetrahydromethanopterin reductase     | 11.7                     |
| IYO_014785 | sugar ABC transporter                                | 11.4                     |
| IYO_026610 | acyl-CoA dehydrogenase                               | 11.0                     |
| IYO_006025 | alginate O-acetyltransferase                         | 11.0                     |

|            |                                                               |      |
|------------|---------------------------------------------------------------|------|
| IYO_012440 | hypothetical protein                                          | 10.7 |
| IYO_020560 | peptidase M4                                                  | 10.4 |
| IYO_011310 | NAD(P)H-dependent FMN reductase                               | 10.2 |
| IYO_024090 | porin                                                         | 10.1 |
| IYO_003290 | hypothetical protein                                          | 10.0 |
| IYO_010385 | lipoprotein                                                   | 10.0 |
| IYO_027985 | hypothetical protein                                          | 9.8  |
| IYO_006045 | poly(beta-D-mannuronate) C5 epimerase                         | 9.6  |
| IYO_006035 | poly(beta-D-mannuronate) lyase                                | 9.6  |
| IYO_014780 | sugar ABC transporter substrate-binding protein               | 9.5  |
| IYO_016140 | monooxygenase                                                 | 9.1  |
| IYO_017240 | biopolymer transporter ExbD                                   | 9.1  |
| IYO_011305 | lysine transporter LysE                                       | 8.7  |
| IYO_001790 | taurine transporter ATP-binding subunit                       | 8.7  |
| IYO_026775 | alpha/beta hydrolase                                          | 8.6  |
| IYO_024095 | ABC transporter substrate-binding protein                     | 8.5  |
| IYO_027980 | ABC transporter permease                                      | 8.1  |
| IYO_026630 | ABC transporter permease                                      | 7.8  |
| IYO_001460 | prophage PssSM-01                                             | 7.7  |
| IYO_011840 | hemolysin D                                                   | 7.7  |
| IYO_013055 | aldolase                                                      | 7.4  |
| IYO_026680 | taurine dioxygenase                                           | 7.2  |
| IYO_014465 | hypothetical protein                                          | 6.9  |
| IYO_014710 | lipoprotein                                                   | 6.8  |
| IYO_017510 | lipoprotein                                                   | 6.8  |
| IYO_001820 | hypothetical protein                                          | 6.8  |
| IYO_027915 | alkanesulfonate transporter permease subunit                  | 6.7  |
| IYO_016110 | branched-chain amino acid ABC transporter ATP-binding protein | 6.6  |
| IYO_009290 | LTXQ domain-containing protein                                | 6.6  |
| IYO_006935 | hypothetical protein                                          | 6.5  |
| IYO_016115 | ABC transporter permease                                      | 6.3  |
| IYO_009230 | sulfurtransferase                                             | 6.1  |
| IYO_013050 | nitrate ABC transporter substrate-binding protein             | 6.0  |
| IYO_020620 | hypothetical protein                                          | 5.8  |
| IYO_011220 | Fis family transcriptional regulator                          | 5.8  |
| IYO_029660 | coenzyme F390 synthetase (plasmid)                            | 5.6  |
| IYO_027965 | sulfate ABC transporter ATP-binding protein                   | 5.4  |
| IYO_005875 | hypothetical protein                                          | 5.4  |
| IYO_016125 | ABC transporter permease                                      | 5.4  |
| IYO_001465 | prophage PssSM-01                                             | 5.3  |
| IYO_011375 | class V aminotransferase                                      | 5.3  |

|                   |                          |     |
|-------------------|--------------------------|-----|
| <b>IYO_009250</b> | ABC transporter permease | 5.3 |
| <b>IYO_001810</b> | ribonucleotide reductase | 5.2 |
| <b>IYO_004495</b> | hypothetical protein     | 5.1 |
| <b>IYO_001805</b> | transposase              | 5.1 |
| <b>IYO_028000</b> | diguanylate cyclase      | 5.0 |
| <b>IYO_009615</b> | serine dehydratase       | 5.0 |

836

837

838 Table S8. Expression levels of secondary metabolite gene clusters. Reads Per  
 839 Kilobase per Million reads were means plus/minus standard deviation for each gene  
 840 across all time points.

841

| Secondary metabolite pathway                  | Function                           | Gene members      | Induction levels <i>in planta</i>                                 |
|-----------------------------------------------|------------------------------------|-------------------|-------------------------------------------------------------------|
| <b>Novel Non-ribosomal peptide synthetase</b> | unknown                            | IYO_003775-003830 | Constitutive expression <i>in planta</i> (average RPKM 67 +/- 43) |
| <b>Pyoverdine</b>                             | Iron chelation                     | IYO_010820-010910 | Constitutive expression <i>in planta</i> (average RPKM 41 +/- 43) |
| <b>Achromobactin</b>                          | Iron chelation                     | IYO_013460-013515 | Constitutive expression <i>in planta</i> (average RPKM 17 +/- 9)  |
| <b>Yersiniabactin</b>                         | Iron chelation                     | IYO_013840-013910 | Constitutive expression <i>in planta</i> (average RPKM 15 +/-19)  |
| <b>Unknown</b>                                | unknown                            | IYO_026725-026760 | Weak constitutive <i>in planta</i> (expression 48 +/-16 RPKM)     |
| <b>Mangotoxin</b>                             | Inhibitor of ornithine deacetylase | IYO_028470-028715 | Weak expressed <i>in planta</i> (average RPKM 13 +/- 9)           |
| <b>Plasmid-borne pathway</b>                  | unknown                            | IYO_029645-029685 | Induced late <i>in planta</i> (see figure 5)                      |

842

843

844 Table S9. RPKM values of genes encoding proteins predicted to be secreted via T2SS. HPI, hours post infection.

845

| # ID       | Function                                                            | Phase | <i>in vitro</i> | 1.5 HPI | 3 HPI  | 12 HPI | 24 HPI | 8 HPI  | 72 HPI | 96 HPI | 120 HPI |
|------------|---------------------------------------------------------------------|-------|-----------------|---------|--------|--------|--------|--------|--------|--------|---------|
| IYO_011995 | phosphate ABC transporter substrate-binding protein                 | Early | 39.5            | 3366.6  | 5876.1 | 3269.3 | 2774.8 | 1220.1 | 1143.4 | 1114.5 | 1774.3  |
| IYO_019585 | thioredoxin                                                         | Early | 59.4            | 1525.9  | 1863.2 | 983.2  | 433.9  | 374.4  | 329.6  | 350.7  | 469.3   |
| IYO_027385 | ABC transporter substrate-binding protein                           | Early | 10.4            | 222.5   | 306.4  | 105.9  | 117.6  | 54.4   | 68.2   | 7.9    | 58.9    |
| IYO_006115 | amino acid ABC transporter substrate-binding protein                | Early | 117.7           | 3408.6  | 2742.5 | 843.8  | 829.8  | 596.2  | 750.2  | 622.4  | 722.3   |
| IYO_028665 | phosphate-binding protein                                           | Early | 33.6            | 759.5   | 683.8  | 278.3  | 194.3  | 145.9  | 138.5  | 166.4  | 210.9   |
| IYO_000970 | ammonia channel protein                                             | Early | 43.5            | 1336.6  | 811.4  | 274.2  | 268.1  | 231.2  | 409.6  | 259.8  | 426.5   |
| IYO_021410 | short-chain dehydrogenase                                           | Early | 6.6             | 142.6   | 113.3  | 26.3   | 33.4   | 19.3   | 4.4    | 19.6   | 12.1    |
| IYO_010675 | phosphatase                                                         | Early | 32.6            | 228.2   | 410.1  | 158.8  | 97.9   | 151.1  | 56.9   | 80.3   | 89.7    |
| IYO_021050 | ABC transporter substrate-binding protein                           | Early | 55.0            | 945.8   | 685.8  | 281.4  | 281.5  | 212.0  | 245.3  | 245.3  | 224.0   |
| IYO_020035 | ABC transporter substrate-binding protein                           | Early | 131.3           | 1169.0  | 1415.7 | 583.5  | 416.4  | 253.4  | 327.7  | 249.7  | 292.0   |
| IYO_014740 | sugar ABC transporter substrate-binding protein                     | Early | 59.2            | 490.2   | 604.3  | 243.3  | 163.4  | 143.6  | 89.5   | 131.6  | 96.6    |
| IYO_020310 | hypothetical protein                                                | Early | 24.9            | 380.2   | 242.5  | 139.5  | 139.0  | 187.8  | 112.7  | 43.1   | 75.4    |
| IYO_004585 | branched-chain amino acid ABC transporter substrate-binding protein | Early | 87.8            | 956.2   | 489.1  | 174.2  | 232.2  | 130.6  | 255.0  | 172.8  | 338.3   |
| IYO_025190 | protein hupE                                                        | Early | 25.0            | 198.5   | 123.6  | 36.9   | 61.1   | 38.8   | 90.6   | 89.1   | 123.2   |
| IYO_006385 | porin                                                               | Early | 1383.7          | 7387.9  | 6833.1 | 1618.0 | 1721.0 | 1130.5 | 1055.6 | 984.5  | 945.0   |
| IYO_020485 | glycine/betaine ABC transporter substrate-binding protein           | Early | 33.5            | 134.6   | 129.0  | 35.6   | 46.6   | 43.4   | 44.4   | 37.1   | 32.5    |
| IYO_008325 | polygalacturonase                                                   | Early | 164.0           | 369.3   | 564.7  | 150.2  | 140.3  | 107.1  | 97.9   | 83.8   | 107.4   |
| IYO_021455 | Methylamine utilization protein MauL                                | Early | 94.4            | 582.6   | 317.5  | 319.1  | 399.1  | 422.6  | 247.9  | 279.5  | 147.7   |
| IYO_004580 | urea ABC transporter permease                                       | Early | 14.9            | 74.3    | 43.4   | 20.5   | 16.3   | 35.5   | 30.8   | 19.4   | 22.0    |
| IYO_026915 | amino acid ABC transporter substrate-binding protein                | Early | 50.4            | 426.4   | 139.6  | 38.5   | 65.7   | 44.0   | 87.4   | 35.9   | 98.4    |
| IYO_006365 | sugar ABC transporter substrate-binding protein                     | Early | 1316.7          | 2310.1  | 3559.7 | 671.4  | 762.4  | 398.4  | 474.9  | 375.7  | 335.4   |
| IYO_024670 | hypothetical protein part of ICE                                    | Early | 34.2            | 23.9    | 18.9   | 59.0   | 31.6   | 29.2   | 22.7   | 8.5    | 38.9    |
| IYO_006805 | type III secretion protein                                          | Mid   | 57.1            | 309.6   | 1263.6 | 1201.0 | 751.4  | 414.5  | 501.0  | 276.3  | 450.1   |
| IYO_002045 | hypothetical protein                                                | Mid   | 73.0            | 63.8    | 30.4   | 1006.5 | 102.8  | 120.8  | 106.7  | 104.0  | 50.3    |

|            |                                           |     |        |        |        |         |         |         |         |         |         |
|------------|-------------------------------------------|-----|--------|--------|--------|---------|---------|---------|---------|---------|---------|
| IYO_009660 | hypothetical protein                      | Mid | 31.6   | 11.5   | 0.0    | 280.3   | 84.6    | 121.0   | 73.3    | 66.4    | 81.0    |
| IYO_002040 | hypothetical protein                      | Mid | 60.1   | 51.1   | 27.5   | 479.1   | 77.9    | 74.5    | 104.8   | 106.2   | 117.1   |
| IYO_001870 | hypothetical protein                      | Mid | 510.6  | 318.1  | 478.1  | 2793.5  | 2242.8  | 1524.5  | 1518.2  | 1974.0  | 1162.6  |
| IYO_006020 | alginate O-acetyltransferase              | Mid | 88.2   | 49.0   | 27.9   | 423.9   | 197.5   | 278.0   | 383.9   | 259.6   | 417.2   |
| IYO_023395 | TonB-dependent receptor                   | Mid | 25.2   | 19.7   | 20.4   | 98.7    | 101.4   | 46.8    | 37.8    | 47.0    | 83.2    |
| IYO_008760 | sorbosone dehydrogenase                   | Mid | 105.4  | 49.9   | 40.3   | 391.5   | 269.6   | 218.2   | 157.1   | 176.8   | 125.4   |
| IYO_018720 | sorbosone dehydrogenase                   | Mid | 60.3   | 37.9   | 25.8   | 224.0   | 111.0   | 97.4    | 102.4   | 122.0   | 93.4    |
| IYO_027210 | peptidase M20                             | Mid | 53.5   | 35.4   | 114.4  | 189.8   | 132.1   | 98.8    | 88.0    | 68.1    | 119.3   |
| IYO_022715 | phospholipid-binding protein              | Mid | 8230.8 | 2550.5 | 2568.7 | 29098.2 | 18992.7 | 15528.5 | 13209.7 | 16287.6 | 10178.4 |
| IYO_004060 | hypothetical protein                      | Mid | 1959.4 | 7898.0 | 5063.3 | 6887.1  | 5478.9  | 4687.6  | 4501.3  | 3573.6  | 3898.1  |
| IYO_019200 | BNR/Asp-box repeat-containing protein     | Mid | 56.0   | 117.1  | 157.2  | 196.2   | 133.8   | 88.1    | 59.6    | 80.2    | 66.9    |
| IYO_004055 | membrane protein                          | Mid | 34.6   | 39.5   | 114.7  | 86.9    | 62.9    | 37.4    | 39.6    | 39.0    | 33.7    |
| IYO_006835 | type III secretion protein                | Mid | 312.2  | 275.5  | 532.0  | 847.3   | 672.8   | 399.1   | 381.4   | 330.7   | 383.1   |
| IYO_020600 | ABC transporter substrate-binding protein | Mid | 76.1   | 47.3   | 60.0   | 198.5   | 143.9   | 138.9   | 98.6    | 106.3   | 119.6   |
| IYO_022515 | toluene tolerance protein                 | Mid | 116.7  | 73.1   | 109.9  | 251.8   | 129.2   | 148.1   | 174.9   | 121.3   | 128.6   |
| IYO_006575 | superoxide dismutase                      | Mid | 178.1  | 46.6   | 35.6   | 375.8   | 202.9   | 114.6   | 173.8   | 176.6   | 223.3   |
| IYO_022005 | hypothetical protein                      | Mid | 45.1   | 33.6   | 34.6   | 88.2    | 69.7    | 55.2    | 0.0     | 17.9    | 66.5    |
| IYO_027595 | phosphorylcholine phosphatase             | Mid | 50.4   | 33.8   | 36.3   | 82.4    | 97.7    | 53.8    | 62.8    | 63.3    | 64.2    |
| IYO_011990 | hypothetical protein                      | Mid | 1900.4 | 539.1  | 489.4  | 3491.9  | 1831.7  | 1693.3  | 1220.1  | 1023.3  | 836.5   |
| IYO_027840 | ABC transporter substrate-binding protein | Mid | 70.8   | 93.0   | 65.3   | 56.8    | 99.4    | 36.2    | 24.1    | 37.9    | 42.6    |
| IYO_017485 | hypothetical protein                      | Mid | 300.2  | 114.9  | 115.4  | 411.4   | 188.4   | 259.0   | 298.3   | 216.1   | 202.3   |
| IYO_010560 | cytochrome C                              | Mid | 86.6   | 54.4   | 56.6   | 92.6    | 76.9    | 66.5    | 80.4    | 56.4    | 49.9    |
| IYO_014770 | hypothetical protein                      | Mid | 208.1  | 169.6  | 157.6  | 200.6   | 190.5   | 206.4   | 197.7   | 172.8   | 410.9   |
| IYO_011885 | type III effector                         | Mid | 25.2   | 6.4    | 3.6    | 7.2     | 7.8     | 8.5     | 6.0     | 3.4     | 2.9     |

846

847
